# Supplementary material for: Coagulation Dysfunction Criteria in Critically Ill Children: The PODIUM Consensus Conference
Source: Oxford University Press journal article supplement (doi:10.1542/peds.2021-052888l), 2021-12-31
Supplement: peds_2021052888lsupplementarydata.pdf [file peds_2021052888lsupplementarydata.pdf]

**Coagulation Dysfunction Criteria in Critically Ill Children:  
The PODIUM Consensus Conference**

E. Vincent S. Faustino, MD, MHS<sup>a</sup>, Oliver Karam, MD, PhD<sup>b</sup>, Robert I. Parker, MD<sup>c</sup>, Sheila J. Hanson, MD, MS<sup>d</sup>, Leonardo R. Brandão, MD, MSc<sup>e, f</sup>,  
and Paul Monagle, MBBS, MD, MSc, FRACP, FRCPA, FCCP<sup>g, h, i, j</sup>

**Data Supplement**

**Table of Contents**

| <b>Content</b>                                                                                                                                                 | <b>Pages</b> |
|----------------------------------------------------------------------------------------------------------------------------------------------------------------|--------------|
| <b>Supplemental Figure 1.</b> Risk of Bias Assessment Summary for Studies Included in the PODIUM Coagulation Dysfunction Systematic Review (n=86 studies)      | 2            |
| <b>Supplemental Table 1.</b> Studies Included in the PODIUM Coagulation Dysfunction Systematic Review (n=86 studies)                                           | 3-11         |
| <b>Supplemental Table 2.</b> Performance Characteristics for Assessment Tools and Scores for Coagulation Dysfunction in Critically Ill Children (n=86 studies) | 12-25        |
| <b>References</b>                                                                                                                                              | 26-30        |
| <b>Research Priorities</b>                                                                                                                                     | 31-32        |

**Supplemental Figure 1.** Risk of Bias Assessment Summary for Studies Included in the PODIUM Coagulation Dysfunction Systematic Review (n=86 studies)

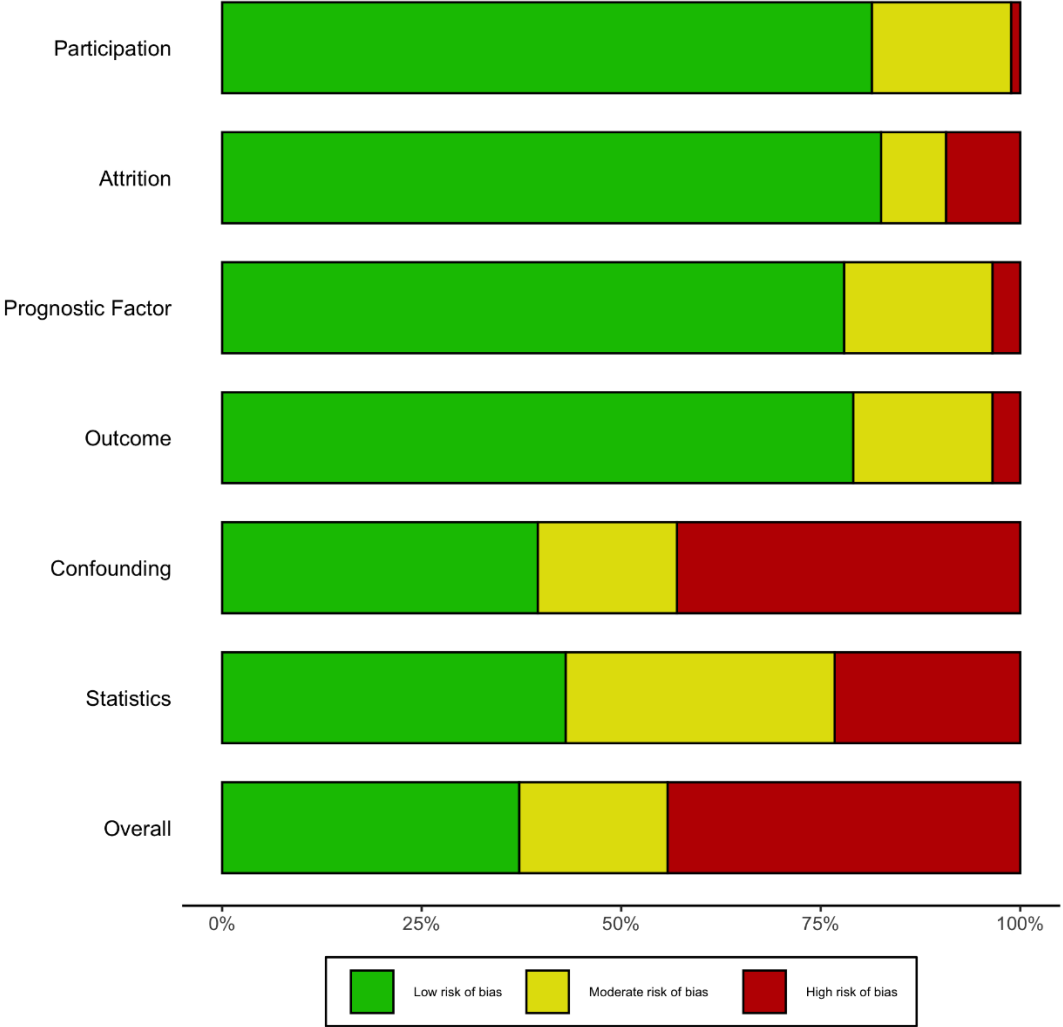

**Supplemental Table 1. Studies Included in the PODIUM Coagulation Dysfunction Systematic Review (n=86 studies)**

| Author (yr)           | Funding | Study design                                              | Location     | No. of sites | Study years | Setting                                    | Data source(s)                              | Sample size                          | Recruitment            | Age categories <sup>a</sup>                    | Age details                                                                                                  |
|-----------------------|---------|-----------------------------------------------------------|--------------|--------------|-------------|--------------------------------------------|---------------------------------------------|--------------------------------------|------------------------|------------------------------------------------|--------------------------------------------------------------------------------------------------------------|
| <b>A – Platelets</b>  |         |                                                           |              |              |             |                                            |                                             |                                      |                        |                                                |                                                                                                              |
| Baslaim 2006          | NR      | Retrospective cohort                                      | Saudi Arabia | 1            | 2000-2004   | PCICU (cardiac only)                       | Chart review                                | 26                                   | Consecutive            | Neonates<br>Infants<br>Children                | Mean 16.4 mo [range 0.5-144]                                                                                 |
| ElBassetAboElEzz 2017 | NR      | Prospective cohort                                        | Egypt        | 1            | 2014-2015   | PICU of unknown composition                | Prospective data collection                 | 40                                   | NR/Unable to determine | Children<br>Adolescents                        | Age of patient group ranged from 1.5 to 8.5 yr with mean age of 4.9                                          |
| Faraoni 2015          | NGO     | Retrospective cohort                                      | Belgium      | 1            | 2010-2012   | PCICU (cardiac only)                       | Registry                                    | 150                                  | Consecutive            | Infants<br>Children                            | Median 14 mo [5-40]                                                                                          |
| Jhang 2018            | NR      | Retrospective cohort                                      | South Korea  | 1            | 2013-2017   | PICU (non-cardiac only)                    | Chart review                                | 89                                   | Consecutive            | Neonates<br>Infants<br>Children<br>Adolescents | Median 117.3 mo [range 0-286.4]                                                                              |
| Leeper 2017           | NR      | Prospective cohort<br>Observational/<br>descriptive study | USA          | 1            | 2015-2016   | Emergency room (ER)                        | Prospective data collection                 | 133                                  | Consecutive            | Infants<br>Children<br>Adolescents             | Median 10 yr [IQR 5-13]                                                                                      |
| Leeper 2018           | NGO     | Prospective cohort<br>Observational/<br>descriptive study | USA          | 1            | 2015-2017   | PICU (non-cardiac only)                    | Prospective data collection                 | 101                                  | Consecutive            | Infants<br>Children<br>Adolescents             | Median 8 yr [IQR 4-12]                                                                                       |
| Lin 2017              | NGO     | Prospective cohort<br>Observational/<br>descriptive study | Taiwan       | 1            | 2012-2015   | PICU of unknown composition                | Prospective data collection                 | 42                                   | Consecutive            | Infants<br>Children                            | Median 4.1 yr [IQR 1.7-8.7]                                                                                  |
| Liras 2015            | NR      | Retrospective cohort                                      | USA          | 1            | 2010-2013   | Emergency room (ER)                        | Registry                                    | 1819                                 | Consecutive            | Children<br>Adolescents                        | Hyperfibrinolytic group median 11 yr [IQR 4-15], non hyperfibrinolytic group median 15 yr [IQR 9-16] p<0.001 |
| Liras 2017            | NR      | Retrospective cohort                                      | USA          | 1            | 2010-2016   | Emergency room (ER),NR/Unable to determine | Registry                                    | 956                                  | Consecutive            | NR/Unable to determine                         | Coagulopathic group median 14 yr [IQR 6-16], control group median 15 yr [IQR 9-16], p=0.008                  |
| Moxon 2015            | NR      | Prospective cohort                                        | Malawi       | 1            | 2008-2011   | NR/Unable to determine                     | Chart review<br>Prospective data collection | malaria patients =267; controls =135 | NR/Unable to determine | NR/Unable to determine                         | Retinopathy (+) malaria: median 45 mo (95%CI 33-62); retinopathy (-) malaria: 45 mo (95%CI 28-52)            |
| Oladunjoye 2018       | NR      | Prospective cohort                                        | USA          | 1            | 2015-2016   | PCICU (cardiac only)                       | Prospective data collection                 | 202                                  | Consecutive            | Neonates<br>Infants<br>Children                | Median age at surgery 0.4 yr [IQR 0.1-2.3]                                                                   |

|                            |          |                                                                                                                     |          |    |                              |                                            |                                                            |                                           |                           |                                                |                                                                                              |
|----------------------------|----------|---------------------------------------------------------------------------------------------------------------------|----------|----|------------------------------|--------------------------------------------|------------------------------------------------------------|-------------------------------------------|---------------------------|------------------------------------------------|----------------------------------------------------------------------------------------------|
| Padungm<br>aneesub<br>2019 | NGO      | Prospective<br>cohort                                                                                               | Thailand | 1  | 2016-2016                    | Mixed PICU<br>(cardiac and<br>non-cardiac) | Prospective<br>data collection                             | 103                                       | Consecutive               | Infants<br>Children<br>Adolescents             | Mean 3.6 yr (4.4)                                                                            |
| Rajkumar<br>2017           | NR       | Prospective<br>cohort<br>Observational/<br>descriptive<br>study                                                     | India    | 1  | 2015-2016                    | NR/Unable<br>to determine                  | Prospective<br>data collection                             | 87                                        | NR/Unable<br>to determine | Infants<br>Children                            | Range 6 mo-14 yr                                                                             |
| Rajpurkar<br>2019          | Govt.    | Non-<br>randomized/q<br>uasi<br>randomized<br>controlled trial                                                      | NR       | NR | Other<br>(oncology<br>units) | Prospective<br>data<br>collection          | 79                                                         | Consec<br>utive                           | Children<br>Adolescents   | NR                                             | NR                                                                                           |
| Schmidt<br>2018            | Industry | Randomized<br>controlled trial<br>(RCT) cross-<br>over RCT<br>pragmatic<br>RCT                                      | USA      | 1  | NR                           | NR/Unable<br>to determine                  | Prospective<br>data collection                             | 162                                       | Consecutive               | Neonates<br>Infants<br>Children<br>Adolescents | Median 7 mo [range 2 days - 17 yr]                                                           |
| Schneider<br>2011          | NR       | Prospective<br>cohort                                                                                               | France   | 1  | NR                           | PICU of<br>unknown<br>composition          | Chart review<br>Prospective<br>data collection             | 49 (25<br>control;<br>24<br>patients<br>) | NR/Unable<br>to determine | Children<br>Adolescents                        | Median 9.7 yr [range 2-17]                                                                   |
| Schochl<br>2011            | NR       | Retrospective<br>cohort                                                                                             | Austria  | 1  | 2005-2010                    | NR/Unable<br>to determine                  | Chart review<br>Prospective<br>data collection             | 88                                        | NR/Unable<br>to determine | Adolescents                                    | Mean 48yr [range 13-87]                                                                      |
| Selim<br>2005              | NR       | Prospective<br>cohort                                                                                               | Egypt    | 1  | NR                           | Other (NICU)                               | Prospective<br>data collection                             | 33                                        | NR/Unable<br>to determine | Neonates                                       | NR                                                                                           |
| Selladurai<br>1997         | NR       | Retrospective<br>cohort Case<br>series<br>(patients<br>compiled in<br>serial fashion<br>lacking a<br>control group) | Malaysia | 1  | NR                           | NR/Unable<br>to determine                  | Chart review<br>Prospective<br>data collection             | 204                                       | NR/Unable<br>to determine | NR/Unable<br>to determine                      | NR                                                                                           |
| Thebaud<br>1999            | NR       | Case series<br>(patients<br>compiled in<br>serial fashion<br>lacking a<br>control group)                            | France   | 1  | 1986-1994                    | PICU of<br>unknown<br>composition          | Chart review<br>Prospective<br>data collection             | 14                                        | Consecutive               | Infants<br>Children                            | Range 2-33 mo                                                                                |
| Tzanetos<br>2012           | Govt.    | Prospective<br>cohort Case<br>series<br>(patients<br>compiled in<br>serial fashion<br>lacking a<br>control group)   | USA      | 1  | NR                           | PCICU<br>(cardiac<br>only)                 | Prospective<br>data collection                             | 16                                        | Consecutive               | Neonates<br>Infants<br>Children                | + thrombus (n=5): mean 196.8 days<br>(368.7); no thrombus (n=11): mean<br>518.7 days (436.2) |
| Vogel<br>2013              | NR       | Retrospective<br>cohort Case<br>series<br>(patients                                                                 | USA      | 1  | 2009-2011                    | Mixed PICU<br>(cardiac and<br>non-cardiac) | Chart review<br>Prospective<br>data collection<br>Registry | 86                                        | Consecutive               | Children<br>Adolescents                        | Median 8yr (all <=14yr of age) [IQR 3,<br>12]                                                |

|                         |       |                                                             |                                |     |           |                                                                            |                                             |                                               |                        |                                                |                                                                                                                                                            |
|-------------------------|-------|-------------------------------------------------------------|--------------------------------|-----|-----------|----------------------------------------------------------------------------|---------------------------------------------|-----------------------------------------------|------------------------|------------------------------------------------|------------------------------------------------------------------------------------------------------------------------------------------------------------|
|                         |       | compiled in serial fashion lacking a control group)         |                                |     |           |                                                                            |                                             |                                               |                        |                                                |                                                                                                                                                            |
| Zavadil 1998            | NR    | Retrospective cohort                                        | USA                            | 1   | 1992-1997 | NR/Unable to determine                                                     | Chart review<br>Prospective data collection | 30                                            | Consecutive            | Neonates                                       | Hemorrhage group (n=13): mean 46.7 hours (75.5); non-hemorrhage cohort (n=17): mean 39.1 hours (70.0) (cohorts defined by amount of transfusions received) |
| Zinter 2016             | NR    | Prospective cohort                                          | USA                            | 5   | 2008-2014 | Mixed PICU (cardiac and non-cardiac)                                       | Prospective data collection                 | 259                                           | Consecutive            | Infants<br>Children<br>Adolescents             | Median 5.2 yr [IQR 1.1-13.2]                                                                                                                               |
| Zubair 2015             | NR    | Retrospective cohort<br>Observational/<br>descriptive study | USA                            | 1   | 2008-2014 | Other (pre-op testing)                                                     | Chart review<br>Prospective data collection | 402                                           | NR/Unable to determine | Infants<br>Children                            | Median 2.3 yr [IQR 0.5-9.3]                                                                                                                                |
| <b>B - INR</b>          |       |                                                             |                                |     |           |                                                                            |                                             |                                               |                        |                                                |                                                                                                                                                            |
| Algren 1993             | NR    | Prospective cohort                                          | USA                            | 1   | 1988-1991 | PICU of unknown composition                                                | Chart review<br>Prospective data collection |                                               | Consecutive            | Infants<br>Children<br>Adolescents             | Mean 3 yr, median 1 yr [range 3mo-16 yr]                                                                                                                   |
| Borgman 2011            | NR    | Retrospective cohort                                        | Iraq<br>Afghanistan<br>Germany | 145 | 2002-2009 | Other (military treatment centers and German hospitals unspecified if ICU) | Registry                                    | 1101                                          | Consecutive            | Children<br>Adolescents                        | Median 15 yr [IQR 10-16]                                                                                                                                   |
| Cheuk 2004              | NR    | Retrospective cohort                                        | Hong Kong                      | 1   | 1992-2002 | PICU of unknown composition                                                | Chart review<br>EMR query                   | 19                                            | Consecutive            | Neonates<br>Infants<br>Children<br>Adolescents | Median 7.8 yr [range 8 mo-17 yr]                                                                                                                           |
| Grandjean-Blanchet 2018 | NR    | Retrospective cohort                                        | Canada                         | 1   | 2008-2016 | Emergency room (ER)                                                        | Chart review                                | 284                                           | Consecutive            | NR/Unable to determine                         |                                                                                                                                                            |
| Hu 2017                 | Govt. | Case/control study (case matched)<br>Retrospective cohort   | China                          | 1   | 2010-2016 | NR/Unable to determine                                                     | Chart review                                | derivation cohort= 296; validation cohort= 68 | NR/Unable to determine | Children<br>Adolescents                        | Mean 8 yr (3 yr)                                                                                                                                           |
| Lal 2011                | NR    | Prospective cohort<br>Observational/<br>descriptive study   | India                          | 1   | 2007-2009 | Hospital floor outside the ICU                                             | Prospective data collection                 | 31                                            | Consecutive            | Children<br>Adolescents                        | Mean 8.77 yr (3.62)                                                                                                                                        |
| Leeper 2015             | NR    | Retrospective cohort                                        | USA                            | 1   | 2005-2014 | NR/Unable to determine                                                     | Chart review<br>Registry                    | 101                                           | Consecutive            | Infants<br>Children                            | Median 2 mo [IQR 1-12]                                                                                                                                     |

|                      |                 |                                                                              |                              |    |           |                                                         |                             |                                            |                                                                                                                                   |                                                |                                                                                     |
|----------------------|-----------------|------------------------------------------------------------------------------|------------------------------|----|-----------|---------------------------------------------------------|-----------------------------|--------------------------------------------|-----------------------------------------------------------------------------------------------------------------------------------|------------------------------------------------|-------------------------------------------------------------------------------------|
| Leeper 2016          | NR              | Retrospective cohort<br>Observational/<br>descriptive study                  | USA                          | 1  | 2005-2014 | PICU of unknown composition                             | Registry                    | 776                                        | Consecutive                                                                                                                       | Neonates<br>Infants<br>Children<br>Adolescents | Mean 8.4 yr (5.5)                                                                   |
| Leeper 2016          | NR              | Retrospective cohort<br>Observational/<br>descriptive study                  | USA                          | 1  | 2005-2014 | NR/Unable to determine                                  | Registry                    | 101                                        | Consecutive                                                                                                                       | Neonates<br>Infants                            | INR >1.3 group: median 3 mo [1 mo - 2 y]; INR <1.3 group: median 2 mo [1 mo to 1 y] |
| Liu 2006             | Govt.           | Retrospective cohort                                                         | USA                          | 1  | 1993-2003 | NR/Unable to determine                                  | Registry                    | 81                                         | Consecutive                                                                                                                       | Neonates<br>Infants<br>Children<br>Adolescents | Mean 6.8 yr (6.5), median 4.5 yr [IQR 0.7-12.8]                                     |
| Lu 2008              | Govt.           | Retrospective cohort                                                         | USA                          | 1  | 2002-2006 | NR/Unable to determine                                  | Registry                    | 53                                         | Consecutive                                                                                                                       | Neonates<br>Infants<br>Children<br>Adolescents | Median 3.6 yr [range 0-17.1]                                                        |
| Lu 2013              | NR              | Prospective cohort                                                           | USA                          | 24 | 1999-2008 | Other (hospitalized children)                           | Prospective data collection | 579                                        | Consecutive                                                                                                                       | Neonates<br>Infants<br>Children<br>Adolescents | Median 5.5 yr [IQR 1.1-13.5]                                                        |
|                      |                 |                                                                              | UK<br>Canada                 |    |           |                                                         |                             |                                            |                                                                                                                                   |                                                |                                                                                     |
| McDiarmid 2002       | NGO             | Retrospective cohort                                                         | USA<br>Canada                | 29 | NR        | NR/Unable to determine                                  | Registry                    | 884 (death);<br>779 (death or move to ICU) | NR/Unable to determine                                                                                                            | NR/Unable to determine                         | NR                                                                                  |
| Patregnan i 2012     | NR              | Retrospective cohort<br>Observational/<br>descriptive study                  | USA<br>Germany (US Military) | 7  | 2002-2009 | Other (military theater hospital trauma registry)       | EMR query                   | 744                                        | NR/Unable to determine                                                                                                            | Children<br>Adolescents                        | Median 9 yr [IQR 5-12]                                                              |
| Podolsky-Gondim 2018 | NR              | Retrospective cohort                                                         | Brazil                       | 1  | 2013-2016 | PICU (non-cardiac only), Hospital floor outside the ICU | Chart review                | 66                                         | Consecutive                                                                                                                       | Infants<br>Children<br>Adolescents             | Mean 10.9 yr [range 3 mo - 17 yr]                                                   |
| Ranucci 2019         | NGO<br>Industry | Secondary analysis of RCTs including subgroup analysis<br>Prospective cohort | Italy                        | 1  | NR        | PCICU (cardiac only), Operating room (OR)               | Prospective data collection | 77                                         | Other (some patients enrolled in a previous RCT reported in 2017, the remaining 20 enrolled as a prospective cohort in 2017-2018) | Infants                                        | Median 6 mo [IQR 2-6]                                                               |
| Srivastava 2012      | NR              | Retrospective cohort Case series (patients)                                  | India                        | 1  | 2000-2008 | PICU of unknown composition                             | Chart review                | 130                                        | NR/Unable to determine                                                                                                            | NR/Unable to determine                         | Mean 7.5 yr (4.5)                                                                   |

|                       |       |                                                                                                                      |                    |   |           |                                                  |                                          |      |                        |                                       |                                                                                                                |
|-----------------------|-------|----------------------------------------------------------------------------------------------------------------------|--------------------|---|-----------|--------------------------------------------------|------------------------------------------|------|------------------------|---------------------------------------|----------------------------------------------------------------------------------------------------------------|
|                       |       | compiled in serial fashion lacking a control group)                                                                  |                    |   |           |                                                  |                                          |      |                        |                                       |                                                                                                                |
| TudeMelo 2010         | NGO   | Retrospective cohort Case series (patients compiled in serial fashion lacking a control group) Cross-sectional study | France             | 1 | NR        | Mixed PICU (cardiac and non-cardiac)             | Chart review Prospective data collection | 315  | Consecutive            | Infants Children Adolescents          | Median 77 mo [range 1m-17y]                                                                                    |
| Yang 2019             | Govt. | Retrospective cohort                                                                                                 | China              | 1 | 2007-2018 | PCICU (cardiac only)                             | Chart review                             | 56   | Consecutive            | Infants Children                      | Median 39 mo [range 1.5, 103.5]                                                                                |
| <b>C - Fibrinogen</b> |       |                                                                                                                      |                    |   |           |                                                  |                                          |      |                        |                                       |                                                                                                                |
| Couto-Alves 2013      | Govt. | Retrospective cohort                                                                                                 | UK Austria Holland | 6 | 1996-2011 | PICU of unknown composition                      | Prospective data collection Registry     | 1073 | Consecutive            | Neonates Infants Children Adolescents | Mean 5.12 yr (0.3)                                                                                             |
| Ersoy 2007            | NR    | Prospective cohort                                                                                                   | Turkey             | 1 | NR        | NR/Unable to determine                           | Prospective data collection              | 58   | NR/Unable to determine | Neonates                              | Cases of culture positive sepsis: mean 5.8 (4.5) days, culture negative controls mean 7.5 (4.6) days, $p>0.05$ |
| Faraoni 2014          | NGO   | Retrospective cohort                                                                                                 | Belgium            | 1 | 2010-2012 | PICU of unknown composition, Operating room (OR) | Registry                                 | 156  | Consecutive            | Infants Children                      | Bleeding group: median 4.3 mo [1.8,13]; nonbleeding group: median 15.7 mo [6.8,45]                             |
| Graciano 2005         | NR    | Prospective cohort Observational/ descriptive study                                                                  | USA                | 1 | 1996-1999 | Mixed PICU (cardiac and non-cardiac)             | Chart review                             | 6456 | Consecutive            | Children NR/Unable to determine       | Mean 4.6 yr (5.3)                                                                                              |
| Huang 2011            | NR    | Retrospective cohort                                                                                                 | Taiwan             | 1 | 2000-2009 | NR/Unable to determine                           | Chart review Prospective data collection | 109  | NR/Unable to determine | Neonates Infants Children Adolescents | Mean 5.8 yr                                                                                                    |
| Jevtic 2010           | NR    | Prospective cohort                                                                                                   | Serbia             | 1 | 2004-2009 | Mixed PICU (cardiac and non-cardiac)             | Prospective data collection              | 74   | Consecutive            | Infants Children Adolescents          | Range 3 mo - 195 mo                                                                                            |
| Malley 1996           | NR    | Retrospective cohort                                                                                                 | USA                | 2 | 1985-1990 | NR/Unable to determine                           | Chart review                             | 153  | Consecutive            | Infants Children Adolescents          | Median 24 mo [range 0.7-228]                                                                                   |
| McManus 1993          | NR    | Retrospective cohort                                                                                                 | USA                | 1 | 1982-1992 | Mixed PICU (cardiac and non-cardiac)             | Chart review                             | 53   | NR/Unable to determine | Neonates Infants Children             | Median 4.9 yr [range 18 days-17 y]                                                                             |
| Mitra 2017            | NR    | Prospective cohort                                                                                                   | India              | 1 | NR        | NR/Unable to determine                           | Chart review Prospective data collection | 65   | NR/Unable to determine | Neonates                              | NR                                                                                                             |

|                      |                 |                                                                                              |         |   |           |                                                              |                                             |     |                                                                                                                                   |                                                |                                                               |
|----------------------|-----------------|----------------------------------------------------------------------------------------------|---------|---|-----------|--------------------------------------------------------------|---------------------------------------------|-----|-----------------------------------------------------------------------------------------------------------------------------------|------------------------------------------------|---------------------------------------------------------------|
| Niederwanger 2018    | None            | Case series (patients compiled in serial fashion lacking a control group)                    | Austria | 1 | 2000-2014 | PICU (non-cardiac only)                                      | Chart review                                | 250 | Consecutive                                                                                                                       | Neonates<br>Infants<br>Children<br>Adolescents | Median 35 mo [IQR 6-109]                                      |
| Podolsky-Gondim 2018 | NR              | Retrospective cohort                                                                         | Brazil  | 1 | 2013-2016 | PICU (non-cardiac only), Hospital floor outside the ICU      | Chart review                                | 66  | Consecutive                                                                                                                       | Infants<br>Children<br>Adolescents             | Mean 10.9 yr [range 3 mo - 17 yr]                             |
| Ranucci 2019         | NGO<br>Industry | Secondary analysis of RCTs including subgroup analysis<br>Prospective cohort                 | Italy   | 1 | NR        | PCICU (cardiac only), Operating room (OR)                    | Prospective data collection                 | 77  | Other (some patients enrolled in a previous RCT reported in 2017, the remaining 20 enrolled as a prospective cohort in 2017-2018) | Infants                                        | Median 6 mo [IQR 2-6]                                         |
| Tirosh-Wagner 2011   | NR              | Prospective cohort Case series (patients compiled in serial fashion lacking a control group) | Israel  | 1 | NR        | Mixed PICU (cardiac and non-cardiac), NR/Unable to determine | Chart review<br>Prospective data collection | 15  | NR/Unable to determine                                                                                                            | Infants<br>Children                            | Mean 28 mo [range 1 mo-10 yr]                                 |
| <b>D – D-dimer</b>   |                 |                                                                                              |         |   |           |                                                              |                                             |     |                                                                                                                                   |                                                |                                                               |
| Chen 2017            | Govt.           | Retrospective cohort                                                                         | China   | 1 | 2012-2014 | PICU of unknown composition                                  | Chart review                                | 788 | Consecutive                                                                                                                       | Infants<br>Children                            | Median 8.5 mo [IQR 3.0-20.0]                                  |
| Foad 2014            | NR              | Case/control study (case matched)<br>Prospective cohort<br>Observational/descriptive study   | Egypt   | 1 | 2012-2013 | PICU of unknown composition                                  | Prospective data collection                 | 66  | Consecutive                                                                                                                       | Children<br>Adolescents                        | Mean cases of TBI 6.9 yr (3.8); healthy controls 6.8 yr (2.3) |
| Oren 2005            | NR              | Retrospective cohort                                                                         | Turkey  | 1 | 1988-2003 | Hospital floor outside the ICU                               | Chart review                                | 62  | NR/Unable to determine                                                                                                            | Infants<br>Children<br>Adolescents             | Mean 4yr (range 2 mo-17 yr)                                   |
| Qi 2014              | NR              | Case/control study (case matched)<br>Prospective cohort                                      | China   | 1 | NR        | PICU of unknown composition                                  | Prospective data collection                 | 67  | NR/Unable to determine                                                                                                            | NR/Unable to determine                         | NR                                                            |



|                       |     |                                                                                              |              |   |           |                                             |                                             |                                      |                        |                                                |                                                                                                              |
|-----------------------|-----|----------------------------------------------------------------------------------------------|--------------|---|-----------|---------------------------------------------|---------------------------------------------|--------------------------------------|------------------------|------------------------------------------------|--------------------------------------------------------------------------------------------------------------|
| Wang 2012             | NR  | Prospective cohort Case series (patients compiled in serial fashion lacking a control group) | China        | 1 | 2010-2011 | Mixed PICU (cardiac and non-cardiac)        | Chart review<br>Prospective data collection | 226                                  | NR/Unable to determine | NR/Unable to determine                         | NR                                                                                                           |
| <b>E - Others</b>     |     |                                                                                              |              |   |           |                                             |                                             |                                      |                        |                                                |                                                                                                              |
| Baslaim 2006          | NR  | Retrospective cohort                                                                         | Saudi Arabia | 1 | 2000-2004 | PCICU (cardiac only)                        | Chart review                                | 26                                   | Consecutive            | Neonates<br>Infants<br>Children                | Mean 16.4 mo [range 0.5-144]                                                                                 |
| ElBassetAboElEzz 2017 | NR  | Prospective cohort                                                                           | Egypt        | 1 | 2014-2015 | PICU of unknown composition                 | Prospective data collection                 | 40                                   | NR/Unable to determine | Children<br>Adolescents                        | Age of patient group ranged from 1.5 to 8.5 yr with mean age of 4.9                                          |
| Faraoni 2015          | NGO | Retrospective cohort                                                                         | Belgium      | 1 | 2010-2012 | PCICU (cardiac only)                        | Registry                                    | 150                                  | Consecutive            | Infants<br>Children                            | Median 14 mo [5-40]                                                                                          |
| Jhang 2018            | NR  | Retrospective cohort                                                                         | South Korea  | 1 | 2013-2017 | PICU (non-cardiac only)                     | Chart review                                | 89                                   | Consecutive            | Neonates<br>Infants<br>Children<br>Adolescents | Median 117.3 mo [range 0-286.4]                                                                              |
| Leeper 2017           | NR  | Prospective cohort<br>Observational/<br>descriptive study                                    | USA          | 1 | 2015-2016 | Emergency room (ER)                         | Prospective data collection                 | 133                                  | Consecutive            | Infants<br>Children<br>Adolescents             | Median 10 yr [IQR 5-13]                                                                                      |
| Leeper 2018           | NGO | Prospective cohort<br>Observational/<br>descriptive study                                    | USA          | 1 | 2015-2017 | PICU (non-cardiac only)                     | Prospective data collection                 | 101                                  | Consecutive            | Infants<br>Children<br>Adolescents             | Median 8 yr [IQR 4-12]                                                                                       |
| Lin 2017              | NGO | Prospective cohort<br>Observational/<br>descriptive study                                    | Taiwan       | 1 | 2012-2015 | PICU of unknown composition                 | Prospective data collection                 | 42                                   | Consecutive            | Infants<br>Children                            | Median 4.1 yr [IQR 1.7-8.7]                                                                                  |
| Liras 2015            | NR  | Retrospective cohort                                                                         | USA          | 1 | 2010-2013 | Emergency room (ER)                         | Registry                                    | 1819                                 | Consecutive            | Children<br>Adolescents                        | Hyperfibrinolytic group median 11 yr [IQR 4-15], non hyperfibrinolytic group median 15 yr [IQR 9-16] p<0.001 |
| Liras 2017            | NR  | Retrospective cohort                                                                         | USA          | 1 | 2010-2016 | Emergency room (ER), NR/Unable to determine | Registry                                    | 956                                  | Consecutive            | NR/Unable to determine                         | Coagulopathic group median 14 yr [IQR 6-16], control group median 15 yr [IQR 9-16], p=0.008                  |
| Moxon 2015            | NR  | Prospective cohort                                                                           | Malawi       | 1 | 2008-2011 | NR/Unable to determine                      | Chart review<br>Prospective data collection | malaria patients =267; controls =135 | NR/Unable to determine | NR/Unable to determine                         | Retinopathy (+) malaria: median 45 mo (95%CI 33-62); retinopathy (-) malaria: 45 mo (95%CI 28-52)            |
| Oladunjoye 2018       | NR  | Prospective cohort                                                                           | USA          | 1 | 2015-2016 | PCICU (cardiac only)                        | Prospective data collection                 | 202                                  | Consecutive            | Neonates<br>Infants<br>Children                | Median age at surgery 0.4 yr [IQR 0.1-2.3]                                                                   |

|                            |          |                                                                                                                     |          |    |                              |                                            |                                                            |                                           |                           |                                                |                                                                                              |
|----------------------------|----------|---------------------------------------------------------------------------------------------------------------------|----------|----|------------------------------|--------------------------------------------|------------------------------------------------------------|-------------------------------------------|---------------------------|------------------------------------------------|----------------------------------------------------------------------------------------------|
| Padungm<br>aneesub<br>2019 | NGO      | Prospective<br>cohort                                                                                               | Thailand | 1  | 2016-2016                    | Mixed PICU<br>(cardiac and<br>non-cardiac) | Prospective<br>data collection                             | 103                                       | Consecutive               | Infants<br>Children<br>Adolescents             | Mean 3.6 yr (4.4)                                                                            |
| Rajkumar<br>2017           | NR       | Prospective<br>cohort<br>Observational/<br>descriptive<br>study                                                     | India    | 1  | 2015-2016                    | NR/Unable<br>to determine                  | Prospective<br>data collection                             | 87                                        | NR/Unable<br>to determine | Infants<br>Children                            | Range 6 mo-14 yr                                                                             |
| Rajpurkar<br>2019          | Govt.    | Non-<br>randomized/q<br>uasi<br>randomized<br>controlled trial                                                      | NR       | NR | Other<br>(oncology<br>units) | Prospective<br>data<br>collection          | 79                                                         | Consec<br>utive                           | Children<br>Adolescents   | NR                                             | NR                                                                                           |
| Schmidt<br>2018            | Industry | Randomized<br>controlled trial<br>(RCT) cross-<br>over RCT<br>pragmatic<br>RCT                                      | USA      | 1  | NR                           | NR/Unable<br>to determine                  | Prospective<br>data collection                             | 162                                       | Consecutive               | Neonates<br>Infants<br>Children<br>Adolescents | Median 7 mo [range 2 days - 17 yr]                                                           |
| Schneider<br>2011          | NR       | Prospective<br>cohort                                                                                               | France   | 1  | NR                           | PICU of<br>unknown<br>composition          | Chart review<br>Prospective<br>data collection             | 49 (25<br>control;<br>24<br>patients<br>) | NR/Unable<br>to determine | Children<br>Adolescents                        | Median 9.7 yr [range 2-17]                                                                   |
| Schochl<br>2011            | NR       | Retrospective<br>cohort                                                                                             | Austria  | 1  | 2005-2010                    | NR/Unable<br>to determine                  | Chart review<br>Prospective<br>data collection             | 88                                        | NR/Unable<br>to determine | Adolescents                                    | Mean 48yr [range 13-87]                                                                      |
| Selim<br>2005              | NR       | Prospective<br>cohort                                                                                               | Egypt    | 1  | NR                           | Other (NICU)                               | Prospective<br>data collection                             | 33                                        | NR/Unable<br>to determine | Neonates                                       | NR                                                                                           |
| Selladurai<br>1997         | NR       | Retrospective<br>cohort Case<br>series<br>(patients<br>compiled in<br>serial fashion<br>lacking a<br>control group) | Malaysia | 1  | NR                           | NR/Unable<br>to determine                  | Chart review<br>Prospective<br>data collection             | 204                                       | NR/Unable<br>to determine | NR/Unable<br>to determine                      | NR                                                                                           |
| Thebaud<br>1999            | NR       | Case series<br>(patients<br>compiled in<br>serial fashion<br>lacking a<br>control group)                            | France   | 1  | 1986-1994                    | PICU of<br>unknown<br>composition          | Chart review<br>Prospective<br>data collection             | 14                                        | Consecutive               | Infants<br>Children                            | Range 2-33 mo                                                                                |
| Tzanetos<br>2012           | Govt.    | Prospective<br>cohort Case<br>series<br>(patients<br>compiled in<br>serial fashion<br>lacking a<br>control group)   | USA      | 1  | NR                           | PCICU<br>(cardiac<br>only)                 | Prospective<br>data collection                             | 16                                        | Consecutive               | Neonates<br>Infants<br>Children                | + thrombus (n=5): mean 196.8 days<br>(368.7); no thrombus (n=11): mean<br>518.7 days (436.2) |
| Vogel<br>2013              | NR       | Retrospective<br>cohort Case<br>series<br>(patients                                                                 | USA      | 1  | 2009-2011                    | Mixed PICU<br>(cardiac and<br>non-cardiac) | Chart review<br>Prospective<br>data collection<br>Registry | 86                                        | Consecutive               | Children<br>Adolescents                        | Median 8yr (all<=14yr of age) [IQR 3,<br>12]                                                 |

|              |    |                                                             |     |   |           |                                      |                                             |     |                        |                                    |                                                                                                                                                            |
|--------------|----|-------------------------------------------------------------|-----|---|-----------|--------------------------------------|---------------------------------------------|-----|------------------------|------------------------------------|------------------------------------------------------------------------------------------------------------------------------------------------------------|
|              |    | compiled in serial fashion lacking a control group)         |     |   |           |                                      |                                             |     |                        |                                    |                                                                                                                                                            |
| Zavadil 1998 | NR | Retrospective cohort                                        | USA | 1 | 1992-1997 | NR/Unable to determine               | Chart review<br>Prospective data collection | 30  | Consecutive            | Neonates                           | Hemorrhage group (n=13): mean 46.7 hours (75.5); non-hemorrhage cohort (n=17): mean 39.1 hours (70.0) (cohorts defined by amount of transfusions received) |
| Zinter 2016  | NR | Prospective cohort                                          | USA | 5 | 2008-2014 | Mixed PICU (cardiac and non-cardiac) | Prospective data collection                 | 259 | Consecutive            | Infants<br>Children<br>Adolescents | Median 5.2 yr [IQR 1.1-13.2]                                                                                                                               |
| Zubair 2015  | NR | Retrospective cohort<br>Observational/<br>descriptive study | USA | 1 | 2008-2014 | Other (pre-op testing)               | Chart review<br>Prospective data collection | 402 | NR/Unable to determine | Infants<br>Children                | Median 2.3 yr [IQR 0.5-9.3]                                                                                                                                |

Abbreviations: Govt., government; NGO, nongovernmental organization; NR, not reported; PICU, pediatric intensive care unit; PCICU, pediatric cardiac intensive care unit; IQR, interquartile range

Age presented as mean (SD) or median [range, IQR]

<sup>a</sup>Neonates (0 to 30 days), Infants (31 days to < 1 year), Children (1 year to < 12 years), Adolescents (12 years to < 18 years)

**Supplemental Table 2. Performance Characteristics for Assessment Tools and Scores for Coagulation Dysfunction in Critically Ill Children (n=86 studies)**

| Author (yr)          | Score/assessment tool                                        | Is this a study of score/tool derivation or validation? | Inclusion criteria                                                              | Timing of score/tool assessment                                                                          | Outcomes                    | Performance characteristics                                                                                                                                                                                                                                                                                                                                                                                                                                                                                                                                                                      |
|----------------------|--------------------------------------------------------------|---------------------------------------------------------|---------------------------------------------------------------------------------|----------------------------------------------------------------------------------------------------------|-----------------------------|--------------------------------------------------------------------------------------------------------------------------------------------------------------------------------------------------------------------------------------------------------------------------------------------------------------------------------------------------------------------------------------------------------------------------------------------------------------------------------------------------------------------------------------------------------------------------------------------------|
| <b>A - Platelets</b> |                                                              |                                                         |                                                                                 |                                                                                                          |                             |                                                                                                                                                                                                                                                                                                                                                                                                                                                                                                                                                                                                  |
| Agrawal 2008         | Platelet count                                               | Derivation                                              | General PICU population (mixed cardiac and non-cardiac)                         | day 1, day 4 and day 7 of PICU admission                                                                 | Mortality                   | AUROC: 0.84 for drop in platelet count<br>aOR: 4.15 (1.05-16.3) aOR of death for platelet count <150K                                                                                                                                                                                                                                                                                                                                                                                                                                                                                            |
| Algren 1993          | Coagulation times                                            | Validation                                              | Sepsis Other (confirmed meningococcal infection)                                | first hour of hospitalization (ED or ICU)                                                                | Mortality                   |                                                                                                                                                                                                                                                                                                                                                                                                                                                                                                                                                                                                  |
| Anton-Martin 2017    | Coagulation times<br>Platelet count Other (anti-FXa)         | Derivation                                              | Other (ECMO)                                                                    | 24 and 72 hours before intracranial bleed or infarct for cases, equal date from cannulation for controls | Other (Cerebral Hemorrhage) | Other: No significant differences in median platelet count, PT, PTT, ACT, fibrinogen, and D-dimer between cases of intracranial hemorrhage and controls. Lower maximum anti-Xa level in the hemorrhage group but still within target                                                                                                                                                                                                                                                                                                                                                             |
| Choi 2017            | Platelet count                                               |                                                         | Sepsis                                                                          | PICU day 1 (1st hour)                                                                                    | Mortality                   | Se: 71.4 for all, 78.6 for heme-onc, 85.7 for non heme-onc<br>Sp: 71.0 for all, 66.7 for heme-onc, 78.9 for non-heme onc<br>PPV: 45.5 for all, 57.9 for heme-onc, 42.9 for non-heme-onc<br>NPV: 88.0 for all, 84.2 for heme-onc, 96.8 for non-heme-onc<br>AUROC: platelet count AUROC 0.796 p=0 CI 0.69-0.90 for all, 0.722 p=0.024 CI 0.55-0.89 for heme-onc, 0.857 p=0.003 CI 0.70-1 for non-heme-onc<br>Youden's index: platelet cutoff 52K for all patients 30.5K for heme-onc, and 106K for non-heme-onc<br>aOR: 0.988 CI 0.988 (0.977-0.999) for platelet count association with mortality |
| Chua 1993            | Coagulation times<br>Platelet count                          | Derivation                                              | Other (clinical diagnosis of dengue shock syndrome or dengue hemorrhagic fever) | Hospital day 1                                                                                           | Mortality, Other (Bleeding) | Se: prolonged PT had sensitivity of 56.2% for bleeding,<br>Sp: prolonged PT and specificity of 61% for bleeding<br>PPV: prolonged PT had PPV 84% for bleeding, prolonged PTT had PPV 77% for bleeding<br>NPV: Prolonged PTT had NPV 23% for bleeding<br>Other: one way ANOVA, p <0.001 for Death with prolonged PTT >30 sec. One way Anova showed no association with mortality for prolonged PT.                                                                                                                                                                                                |
| Couto-Alves 2013     | Coagulation times<br>Platelet count Other (Fibrinogen level) | Derivation                                              | Other (meningococcal sepsis)                                                    | first recorded sample                                                                                    | Mortality                   | LR: composite of base excess and platelet count LR test p<0.001, Hosmer-Lemeshow chi square test=20.2, p=0.009<br>Goodness of fit: composite of base excess and platelet count goodness of fit Nagelkerke pseudo-R <sup>2</sup> =0.3 and Brier score =0.046. Calibration of the BEP score on the entire consortium dataset shows a relatively small underestimation of the probability of death for BEP > 0.3 (the mean absolute error is 0.025 and the 0.9 quantile of the absolute error is only 0.066)                                                                                        |

|                |                                                                                          |                                                    |                                                                                          |                                                                                                                                           |                                                                                        |                                                                                                                                                                                                                                                                                                                                                                                                                                                                                                                                                                            |
|----------------|------------------------------------------------------------------------------------------|----------------------------------------------------|------------------------------------------------------------------------------------------|-------------------------------------------------------------------------------------------------------------------------------------------|----------------------------------------------------------------------------------------|----------------------------------------------------------------------------------------------------------------------------------------------------------------------------------------------------------------------------------------------------------------------------------------------------------------------------------------------------------------------------------------------------------------------------------------------------------------------------------------------------------------------------------------------------------------------------|
| Ersoy 2007     | Platelet count<br>Coagulation factor concentration or activity Other (AT and fibrinogen) | Derivation                                         | Sepsis                                                                                   | not clear- at time of diagnosis of sepsis                                                                                                 | Mortality                                                                              | Se: AT level of 15mg/dl=92.3%, fibrinogen level of 150mg/dL =92.3%<br>Sp: AT level of 15mg/dl =61.9%, fibrinogen level of 150mg/dL =80.9%<br>PPV: AT level of 15mg/dl =60.0%, fibrinogen level of 150mg/dL =25%<br>NPV: AT level of 15mg/dl =92.8%, fibrinogen level of 150mg/dL =61.7%<br>aOR: platelet count was not significant for mortality, AT level had OR 0.54, CI 0.37-0.96, p=0.002 for mortality,                                                                                                                                                               |
| Graciano 2005  | Coagulation times<br>Platelet count Other (fibrinogen)                                   | Derivation                                         | General PICU population (only non-cardiac)                                               | worst value throughout PICU stay                                                                                                          | Mortality                                                                              | Other: Correlation between hematologic dysfunction, quantified using the worst fibrinogen level (mol/L), and the pediatric intensive care unit mortality rate. R =0.98, p =.0035                                                                                                                                                                                                                                                                                                                                                                                           |
| Housinger 1993 | Platelet count                                                                           | Other (descriptive)                                | Other (Burned patients)                                                                  | varied- lowest platelet count and duration of platelet count < 0.1 x10 to the 12th/L                                                      | Mortality                                                                              | Other: only Chi Squared, Survivors had mean days of 2.7 +- 10 of platelet count less than 0.1 x 10 th the 12th/L vs 8.3 +-9.0 days for nonsurvivors                                                                                                                                                                                                                                                                                                                                                                                                                        |
| Hu 2017        | Coagulation times<br>Platelet count                                                      | Other (derivation and validation cohorts reported) | Other (TBI; develop score to predict progressive hemorrhagic injury)                     | on admission to PICU                                                                                                                      | Other (progressive intracranial/cerebral parenchymal hemorrhage)                       | Other: C-statistic; 0.873 (95% CI 0.806-0.904)                                                                                                                                                                                                                                                                                                                                                                                                                                                                                                                             |
| Huang 2011     | Coagulation times<br>Platelet count Other (fibrinogen)                                   |                                                    | Sepsis Other (acalculous cholecystitis)                                                  | at time of diagnosis                                                                                                                      | Mortality                                                                              | Other: descriptive statistics comparing survivors vs non-survivors; p-value determined                                                                                                                                                                                                                                                                                                                                                                                                                                                                                     |
| Isguder 2016   | Platelet count Other (mean platelet volume)                                              |                                                    | General PICU population (mixed cardiac and non-cardiac)                                  | admission and @72hrs; values for PLT count and MPV compared between the time points (delta value) and compared survivors to non-survivors | Mortality                                                                              | aOR: parameters for MPV &MPV & deltaMPV higher in non-survivors MPV: p=0.003, dMPV p=0.001,OR 6.4)                                                                                                                                                                                                                                                                                                                                                                                                                                                                         |
| Jhang 2016     | Coagulation times<br>Platelet count DIC                                                  |                                                    | General PICU population (only non-cardiac) Other (labs available to calculate DIC score) | admission to study                                                                                                                        | Other (utility of DIC score to assess risks and compare to severity of illness scores) | AUROC: JAAM DIC score 0.788 (95% CI: 0.675-0.924); ISTH DIC score 0.716 (95% CI: 0.598-0.834)<br>aOR: JAAM DIC score: OR 5.287; ISTH DIC score: OR 4.091 re: mortality prediction                                                                                                                                                                                                                                                                                                                                                                                          |
| Kalkwarf 2018  | Coagulation times<br>Platelet count Other (TEG)                                          | Derivation                                         | Trauma                                                                                   | on admission                                                                                                                              | Mortality                                                                              | Se: Max Amp < 30mm Sensitivity 11%; Ly30>50% Sensitivity 14%;INR>3.0 Sensitivity 12%, Platelet count <30,000 Sensitivity 1%<br>Sp: Max Amp < 30mm Specificity 100%; Ly30>50% Specificity 100%; INR>3.0 Specificity 100%; Platelet count <30,000 Specificity 100%<br>PPV: Max Amp < 30mm 100%; Ly30>50% 100%; INR>3.0 PPV 100%; Platelet count <30,000 PPV 100%<br>NPV: Max Amp < 30mm NPV 93%; Ly30>50% NPV 93%; INR>3.0 NPV 92%; Platelet count <30,000 NPV 92%<br>AUROC: Max Amp < 30mm AUROC 0.554; Ly30> 0.571 INR >3, AUROC 0.515; Platelet count <30,000 AUROC 0.505 |

|                 |                                         |            |                                                         |                                                     |                                         |                                                                                                                                                                                                                                                                                                                                                                                                                                                                                                                                                                                                                                                                                                                                                                                                                                                                                                                                                                                                                                                                                                                                                            |
|-----------------|-----------------------------------------|------------|---------------------------------------------------------|-----------------------------------------------------|-----------------------------------------|------------------------------------------------------------------------------------------------------------------------------------------------------------------------------------------------------------------------------------------------------------------------------------------------------------------------------------------------------------------------------------------------------------------------------------------------------------------------------------------------------------------------------------------------------------------------------------------------------------------------------------------------------------------------------------------------------------------------------------------------------------------------------------------------------------------------------------------------------------------------------------------------------------------------------------------------------------------------------------------------------------------------------------------------------------------------------------------------------------------------------------------------------------|
| Kamal 2011      |                                         |            |                                                         |                                                     | Functional outcomes /residual morbidity | <p>Se: Thrombocytopenia as a risk for poor outcome: sensitivity, 47.6%, (95% CI=25.7%-70.2%)</p> <p>Sp: Thrombocytopenia as a risk for poor outcome: specificity, 77.4% (95% CI=63.8%-87.7%)</p> <p>PPV: PFP (percentage fall of platelet count) of 50% as a risk for poor outcome: PPV was 81.8% (95% CI=59.7%-94.8%).</p> <p>Thrombocytopenia as a risk for poor outcome: PPV, 54.6% (95% CI=24.4%- 67.7%)</p> <p>NPV: PFP (percentage fall of platelet count) of 50% as a risk for poor outcome: NPV was 78.9% (95% CI=65.3%- 88.9%) .</p> <p>Thrombocytopenia as a risk for poor outcome: NPV, 78.9% (95% CI=65.3%-88.9%)</p> <p>LR: PFP (percentage fall of platelet count) of 50% as a risk for poor outcome: LR was 6.98. Thrombocytopenia as a risk for poor outcome: +LR, 2.1</p> <p>AUROC: PFP (percentage fall of platelet count) AUROC 0.831 (95% CI=0.728 - 0.935)</p> <p>Youden's index: From the ROC analysis (Figure 5) and use of Youden's index (J), the optimum cutoff point of PFP (percentage fall of platelet count) was set at 51.5%</p> <p>aOR: PFP (percentage fall of platelet count) of 50%: OR was 16.8 (95% CI=4.7- 59.8)</p> |
| Kilpi 1992      | Platelet count                          | Derivation | Other (bacterial meningitis)                            | day 1,2,4 and 8 of hospitalization                  | Mortality                               | Other: No adjusted analysis, patients who died had lower platelet counts than those who survived, p<0.01                                                                                                                                                                                                                                                                                                                                                                                                                                                                                                                                                                                                                                                                                                                                                                                                                                                                                                                                                                                                                                                   |
| Kornelisse 1997 | Coagulation times<br>Platelet count DIC | Derivation | Sepsis,Other (meningococcal septic shock)               | not specified but appears to be upon admission      | Mortality                               | Other: Logistic regression analysis identified platelet count as being independently associated with likelihood of survival. Further analysis not reported.                                                                                                                                                                                                                                                                                                                                                                                                                                                                                                                                                                                                                                                                                                                                                                                                                                                                                                                                                                                                |
| Krishnan 2008   | Platelet count                          | Derivation | General PICU population (mixed cardiac and non-cardiac) | at admission to PICU                                | Mortality                               | aOR: By logistic regression analysis, Thrombocytopenia at admission was predictive of increased mortality (OR 8.5, CI 2.9 -25; p <0.001). Thrombocytopenic at some point of pediatric intensive care unit stay with those who were never thrombocytopenic had OR 23.8 (95% CI 5.2-108.6), p < 0.0005; and f patients not thrombocytopenic at admission who developed thrombocytopenia during their pediatric intensive care unit stay with those who did not develop any thrombocytopenia had OR 18.6 (95% CI 3.2-107.3) p<0.0005                                                                                                                                                                                                                                                                                                                                                                                                                                                                                                                                                                                                                          |
| Lal 2011        | Coagulation times<br>Platelet count     | Derivation | Other (acute on chronic liver failure)                  | not clearly specified, but after hospital admission | Mortality                               | <p>Se: INR of 3.05 had a sensitivity of 100% for mortality</p> <p>Sp: INR of 3.05 had a specificity of 76%,</p> <p>PPV: INR of 3.05 had a positive predictive value of 44.45%,</p> <p>NPV: INR of 3.05 had a negative predictive value of 100%</p> <p>AUROC: INR: 0.917 (95% CI 0.815-1.019)</p> <p>Other: INR of 3.05 had a diagnostic accuracy of 80%</p>                                                                                                                                                                                                                                                                                                                                                                                                                                                                                                                                                                                                                                                                                                                                                                                                |

|                |                                                                                          |                                              |                                                        |                                     |                                                                                                                                                          |                                                                                                                                                                                                                                                                                                                                                                                                                                                                                                                                                                                                                                                                                                                                                                                                                                                                                       |
|----------------|------------------------------------------------------------------------------------------|----------------------------------------------|--------------------------------------------------------|-------------------------------------|----------------------------------------------------------------------------------------------------------------------------------------------------------|---------------------------------------------------------------------------------------------------------------------------------------------------------------------------------------------------------------------------------------------------------------------------------------------------------------------------------------------------------------------------------------------------------------------------------------------------------------------------------------------------------------------------------------------------------------------------------------------------------------------------------------------------------------------------------------------------------------------------------------------------------------------------------------------------------------------------------------------------------------------------------------|
| Malley 1996    | Coagulation times<br>Platelet count Other<br>(fibrinogen)                                | Derivation                                   | Sepsis Other<br>(invasive<br>meningococcal<br>disease) | upon admission                      | Other (Adverse<br>outcome was<br>defined as death<br>during<br>hospitalization,<br>limb amputation,<br>or loss of all five<br>digits on an<br>extremity) | Se: In validation data: 2 of 3 factors (ANC < 3K, fibrinogen<250 mg/dl or platelet count <150K) was 82% Model using ANC<3K and fibrinogen <250mg/dl was 89%<br>Sp: In validation data: 2 of 3 factors (ANC < 3K, fibrinogen<250 mg/dl or platelet count <150K) was 97% Model using ANC<3K and fibrinogen <250mg/dl was 97%<br>PPV: In validation data: 2 of 3 factors (ANC < 3K, fibrinogen<250 mg/dl or platelet count <150K) was 82% Model using ANC<3K and fibrinogen <250mg/dl was 89%<br>NPV: In validation data: 2 of 3 factors (ANC < 3K, fibrinogen<250 mg/dl or platelet count <150K) was 97% Model using ANC<3K and fibrinogen <250mg/dl was 97%<br>aOR: PT >20s and PTT >60 sec were not significantly associated with adverse outcomes. Platelet count < 150K had aOR 6.2 (CI 1-36, p=0.04), and fibrinogen <250mg/dl had OR 42.7 (CI 4-460, p=0.002) for adverse outcome |
| Martins 2015   | Platelet count                                                                           | Validation                                   | Sepsis Other<br>(invasive<br>meningococcal<br>disease) | first hour of hospital<br>admission | Mortality                                                                                                                                                | Se: composite score of base excess and platelet count with cut off of 0.06 had sensitivity of 83%<br>Sp: composite score of base excess and platelet count with cut off of 0.06 had specificity of 83%<br>AUROC: composite score of base excess and platelet count had an AUROC 0.81 (0.66 - 0.97)                                                                                                                                                                                                                                                                                                                                                                                                                                                                                                                                                                                    |
| Mitra 2017     | Coagulation times<br>Platelet count                                                      |                                              | Sepsis                                                 |                                     | Mortality, Other<br>(DIC)                                                                                                                                | Se: 70.8%<br>Sp: 82.7%<br>PPV: 72.3%<br>NPV: 81.6%<br>Other: Plasma fibrinogen level was found to be significantly higher among neonates with sepsis when compared to neonates in control group (p < 0.0001). It had sensitivity of 70.8 %, specificity of 82.7 %, positive predictive value (PPV) of 72.3 % and negative predictive value (NPV) of 81.6 % for diagnosis of neonatal sepsis at cut-off value of 301.90 mg/dL. When neonates with septic shock and/or disseminated intravascular coagulation (DIC) were excluded from study population, sensitivity and NPV rose to 91.9 % and 95.4 % at the same cut-off value while specificity and PPV remained the same. Lower level of plasma fibrinogen was detected in neonates with septic shock and/or DIC (p < 0.0001) and in neonates who died (p < 0.0001).                                                                |
| Mitsiakos 2015 | Coagulation times<br>Platelet count Other<br>(mean platelet<br>volume; platelet<br>mass) | Sepsis Other<br>(Gram<br>negative<br>sepsis) | day of dx of sepsis,<br>day 2, day 3                   | Mortality                           |                                                                                                                                                          | AUROC: The median PLT count and PM at days 1, 2, and 3 after diagnosis of gram-negative sepsis was significantly associated with the presence of ICH. Regression analysis revealed the cutoff predictive value of 355 fL/nL for the PM at day 3 (area under the curve: 75, sensitivity 90%, P=0.002).<br>Other: The median PLT count and PM at days 1, 2, and 3 after diagnosis of gram-negative sepsis was significantly associated with the presence of ICH. Regression analysis revealed the cutoff predictive value of 355 fL/nL for the PM at day 3 (area under the curve: 75, sensitivity 90%, P=0.002).                                                                                                                                                                                                                                                                        |

|                   |                                                                                         |            |                                                         |                                                                                |                                                                                    |                                                                                                                                                                                                                                                                                                                                                                                                                                                                                                                                                                                                                                                                                                                                                                                                      |
|-------------------|-----------------------------------------------------------------------------------------|------------|---------------------------------------------------------|--------------------------------------------------------------------------------|------------------------------------------------------------------------------------|------------------------------------------------------------------------------------------------------------------------------------------------------------------------------------------------------------------------------------------------------------------------------------------------------------------------------------------------------------------------------------------------------------------------------------------------------------------------------------------------------------------------------------------------------------------------------------------------------------------------------------------------------------------------------------------------------------------------------------------------------------------------------------------------------|
| Niederwanger 2018 | Coagulation factor concentration or activity Other (AT)                                 | Derivation | Sepsis                                                  | AT levels obtained at time of peak CRP +/- 3 days                              | Mortality, Organ-specific outcomes/residual morbidity                              | AUROC: for mortality in children < 1 yo with threshold of 41.5 AUROC 0.83 (0.67 to 0.99) in children > 1 yo with threshold of 67.5 AUROC 0.68 (0.55 to 0.80)<br>aOR: for < 1 yo cut off AT 41.5: mortality 18.8 (1.74-1005.02) CV failure 1.97 (0.41-9.63) CNS failure 2.57 (0.03-213.54) Intestinal failure 1.32 (0.18-7.98) kidney 1.29 (0.1-10.78) liver 0 (0-.16) Respiratory 6.23 (1.23-37.81) MODS 1.39 (0.3-6.92) Bleeding 2.57 (0.03-213.54) clotting 4.46 (0.44-61.51): OR for > 1 yo cut off AT 67.5 mortality 4.46 (1.54-14.89) CV failure 1.53 (0.54-4.5) CNS failure 2.67 (0.57-16.82) Intestinal failure 4.04 (0.97-24.08) kidney 1.09 (0.43-2.77) liver 15.55 (2.16-685.01) Respiratory 1.31 (0.52-3.35) MODS 1.28 (0.58-2.84) Bleeding 4.46 (0.42-225.31) clotting 1.07 (0.08-15.21) |
| Oren 2005         | Coagulation times Platelet count DIC                                                    |            | Other (DIC)                                             | at time of diagnosis w/subsequent interval not specified                       | Mortality                                                                          | Other: descriptive statistics comparing survivors vs non-survivors for each parameter - calculating p-value; none of the measured lab parameters (Hb, WBC, PLT, PT, aPTT, FBGN, D-dimer, FDPs) predicted mortality                                                                                                                                                                                                                                                                                                                                                                                                                                                                                                                                                                                   |
| Patregnani 2012   | Coagulation times Platelet count                                                        |            | Trauma                                                  | on admission                                                                   | Mortality                                                                          | Other: % mortality, descriptive statistics; coagulopathy defined as INR >= 1.5                                                                                                                                                                                                                                                                                                                                                                                                                                                                                                                                                                                                                                                                                                                       |
| Pone 2016         | Platelet count Other (pulmonary or GI bleeding)                                         |            | Sepsis                                                  | admission to study w/subsequent interval not specified                         |                                                                                    | LR: positive likelihood ratio (significant >5.0); negative likelihood ratio (<0.20); hx of hemorrhage or thrombocytopenia did not meet either threshold                                                                                                                                                                                                                                                                                                                                                                                                                                                                                                                                                                                                                                              |
| Purbiya 2018      | Platelet count Other (PDW and PDW/PC ratio)                                             | Validation | General PICU population (mixed cardiac and non-cardiac) | first lab after admission                                                      | Mortality                                                                          | Se: Platelet count: 77.1 PDW: 51.4% PDW/PC: 80%<br>Sp: Platelet count: 75.8% PDW: 73.1% PDW/PC: 75.2%<br>AUROC: Platelet count: 0.80 PDW: 0.665 PDW/PC: 0.811                                                                                                                                                                                                                                                                                                                                                                                                                                                                                                                                                                                                                                        |
| Reed 2010         | Coagulation times Platelet count                                                        |            | Other (ECMO; autopsy data)                              | admission to study w/subsequent interval not clear - manuscript NOT in English | Other (thrombosis or hemorrhage on autopsy)                                        | Other: % patients with finding; no correlation of hemorrhage or thrombosis with any parameters measured (PT, aPTT, FBGN, ACT, PLTs, heparin dose)                                                                                                                                                                                                                                                                                                                                                                                                                                                                                                                                                                                                                                                    |
| Rinka 2008        | Platelet count                                                                          |            | Other (Hemorrhagic Shock Encephalopathy Syndrome)       | on admission                                                                   | Mortality, Functional outcomes /residual morbidity                                 | Other: descriptive statistics; PLT count not predictive of outcome                                                                                                                                                                                                                                                                                                                                                                                                                                                                                                                                                                                                                                                                                                                                   |
| Silva 2007        | Platelet count Other (CBC/ANC; Platelet x Neutrophil product as a predictor of outcome) | Derivation | Other (meningococcal disease)                           | on admission                                                                   | Mortality                                                                          | Se: PN product <= 113: 28.6% (95% CI: 86-58.1)<br>Sp: PN product <= 113: 96.6% (95% CI: 888.1-99.5)<br>PPV: PN product <= 113: 66.7%<br>NPV: 84.8% PN product <= 113:<br>AUROC: PN product <= 113: 0.85 (95% CI: 0.74-0.92)                                                                                                                                                                                                                                                                                                                                                                                                                                                                                                                                                                          |
| Sreenivasan 2018  | Platelet count Other (Platelet count was only useful in setting of hematocrit >40%)     | Derivation | Other (serologically proven dengue fever)               | daily during hospital admission                                                | Other (severe dengue per WHO definition)                                           | aOR: Hematocrit >= 0.40 concurrent with PC <100 x 109/L had an OR 2.985 (95%CI 1.783-4.997) and an adjusted OR 2.252 (95%CI 1.302-3.894) for severe dengue versus non severe dengue                                                                                                                                                                                                                                                                                                                                                                                                                                                                                                                                                                                                                  |
| Tekin 2019        | Other (neutrophil to lymphocyte and platelet to lymphocyte ratios)                      | Derivation | Trauma                                                  | time of admission                                                              | Mortality                                                                          | LR: NLR (OR, 3.21; P=0.048), PLR (OR, 0.90; P=0.032)                                                                                                                                                                                                                                                                                                                                                                                                                                                                                                                                                                                                                                                                                                                                                 |
| Trifa 2014        | Platelet count                                                                          |            | Sepsis                                                  | admission to study w/subsequent interval not clear - manuscript NOT in English | Functional outcomes /residual morbidity, Other (association of platelet count with | Other: thrombocytopenia (<100k) assoc with great incidence of gr (-) agents and with Klebsiella compared to infections in patients w/o thrombocytopenia                                                                                                                                                                                                                                                                                                                                                                                                                                                                                                                                                                                                                                              |



|                         |                                                     |                                                    |                                                                                          |                                                     |                                                                                                |                                                                                                                                                                                                                                                                                                                                  |
|-------------------------|-----------------------------------------------------|----------------------------------------------------|------------------------------------------------------------------------------------------|-----------------------------------------------------|------------------------------------------------------------------------------------------------|----------------------------------------------------------------------------------------------------------------------------------------------------------------------------------------------------------------------------------------------------------------------------------------------------------------------------------|
|                         |                                                     |                                                    |                                                                                          |                                                     | agent causing infection)                                                                       |                                                                                                                                                                                                                                                                                                                                  |
| Whittaker 2013          | Coagulation times<br>Platelet count                 |                                                    | Trauma                                                                                   | on admission                                        | Mortality                                                                                      | aOR: 4.0 if coagulopathy present; modestly increased in non-TBI and more significantly increased in TBI patients; mortality higher in younger (<3y) patients in                                                                                                                                                                  |
| Ye 2018                 | Platelet count Other (platelet volume parameters )  | Derivation                                         | General PICU population (mixed cardiac and non-cardiac), Other (mechanical ventilation ) | trend over first 72 hours in PICU                   | Mortality                                                                                      | aOR: mortality in children, aged from 28 days to 3 years: PLT, 109/l 0.99 (0.99, 1.00) NS MPV, fl 0.98 (0.96, 1.01) NS Plateletcrit, % 12.85 (0.00, 13711.72) NS; mortality in children, aged between >3 and 16 years PLT, 109/l 1.01 (1.00, 1.01) P=0.02 Plateletcrit, % 0.0 (0.00, 469.97) NS PDW, % 1.00 (0.98, 1.02) NS      |
| ZafraAnta 1994          | Coagulation times<br>Platelet count                 |                                                    | Other (acute liver failure)                                                              | admission to study w/subsequent interval not clear  | Mortality, Functional outcomes /residual morbidity, Organ-specific outcomes/residual morbidity | Unable to determine                                                                                                                                                                                                                                                                                                              |
| <b>B - INR</b>          |                                                     |                                                    |                                                                                          |                                                     |                                                                                                |                                                                                                                                                                                                                                                                                                                                  |
| Algren 1993             | Coagulation times                                   | Validation                                         | Sepsis Other (confirmed meningococcal infection)                                         | first hour of hospitalization (ED or ICU)           | Mortality                                                                                      |                                                                                                                                                                                                                                                                                                                                  |
| Borgman 2011            | Validation                                          | Trauma                                             | not clear- assume on admission                                                           | Mortality                                           |                                                                                                | AUROC: composite INR, base deficit and GCS had AUROC of 0.89 CI 0.87-0.92 associated with mortality<br>aOR: INR 2.19 (1.5-3.3) associated with mortality                                                                                                                                                                         |
| Cheuk 2004              | Coagulation times<br>Other (macroscopic hemorrhage) | Derivation                                         | Other (HSCT)                                                                             |                                                     | Mortality                                                                                      | aOR: Macroscopic hemorrhage OR 0.018 for survival (CI 0.001, 0.710) p value 0.032, R2 0.904<br>Other: univariate analysis: macroscopic hemorrhage has RR of mortality is 5.33 (CI 1.92, 14.8) p <0.001, coagulopathy has RR mortality of 4.50 (CI 1.22, 16.6)                                                                    |
| Grandjean-Blanchet 2018 | Other (BIG score: base deficit INR GCS)             | Validation                                         | Trauma                                                                                   | ED prior to ICU admission                           | Mortality                                                                                      | Se: BIG score ≥16 demonstrated a sensitivity of 0.93 (95% confidence interval [CI]: 0.76-0.98)<br>Sp: 0.83 (95% CI: 0.78-0.87)<br>AUROC: BIG score (0.97; 95% IC: 0.95-0.99)                                                                                                                                                     |
| Hu 2017                 | Coagulation times<br>Platelet count                 | Other (derivation and validation cohorts reported) | Other (TBI; develop score to predict progressive hemorrhagic injury)                     | on admission to PICU                                | Other (progressive intracranial/cerebral parenchymal hemorrhage)                               | Other: C-statistic; 0.873 (95% CI 0.806-0.904)                                                                                                                                                                                                                                                                                   |
| Lal 2011                | Coagulation times<br>Platelet count                 | Derivation                                         | Other (acute on chronic liver failure)                                                   | not clearly specified, but after hospital admission | Mortality                                                                                      | Se: INR of 3.05 had a sensitivity of 100% for mortality<br>Sp: INR of 3.05 had a specificity of 76%,<br>PPV: INR of 3.05 had a positive predictive value of 44.45%,<br>NPV: INR of 3.05 had a negative predictive value of 100%<br>AUROC: INR: 0.917 (95% CI 0.815-1.019)<br>Other: INR of 3.05 had a diagnostic accuracy of 80% |

|                      |                                                                                           |                               |                                            |                                                                                                           |                                                    |                                                                                                                                                                                                                                                                                                                                                                                                                                                                                                       |
|----------------------|-------------------------------------------------------------------------------------------|-------------------------------|--------------------------------------------|-----------------------------------------------------------------------------------------------------------|----------------------------------------------------|-------------------------------------------------------------------------------------------------------------------------------------------------------------------------------------------------------------------------------------------------------------------------------------------------------------------------------------------------------------------------------------------------------------------------------------------------------------------------------------------------------|
| Leeper 2015          | Coagulation times                                                                         | Derivation                    | Trauma Other (Abusive head trauma)         | upon hospital admission                                                                                   | Mortality                                          | AUROC: Not specific for INR also includes acidosis, age, and Injury severity score. AUROC=0.8044<br>aOR: Coagulopathy (INR $\geq$ 1.3) OR=7.33 (95% CI 5.69-9.44) p-value<0.001<br>Goodness of fit: The Hosmer-Lemeshow goodness-of-fit test has a nonsignificant p value, indicating adequate fit of our model                                                                                                                                                                                       |
| Leeper 2016          | Coagulation times                                                                         | Derivation                    | Trauma                                     | admission to ICU                                                                                          | Mortality                                          | Se: INR >1.3, 79.8%, INR>1.5 57.3%<br>Sp: INR>1.3 = 77.6%; INR > 1.5 = 92.4%<br>PPV: INR >1.3, 30.8%, INR>1.5 48.6%<br>NPV: INR >1.3, 96.9%, INR>1.5 94.6%<br>Youden's index: Admission INR of 1.3 showed the strongest correlation with J = 0.722 (sensitivity, 80.8%; specificity, 77.6%).<br>aOR: admission INR of 1.3 or greater was the strongest independent predictor of mortality, with an odds ratio of 3.77 (1.95-7.32, p<0.001), admission INR >1.5 had OR of 4.78, CI 2.47-9.26, p<0.001) |
| Leeper 2016          | Coagulation times                                                                         | Derivation                    | Trauma Other (Abusive head trauma)         | upon admission                                                                                            | Mortality                                          | AUROC: INR >1.3 had AUROC of 0.8<br>aOR: INR > 1.3 had aOR 3.65, CI 2.13-6.26, p=0.045; a second logistic regression model incorporating additional variables, INR >1.3 had aOR of 6.25, p=0.006 and then aOR 5.27, p=0.007<br>Goodness of fit: the Hosmer-Lemeshow goodness-of-fit test has a nonsignificant p value, indicating adequate fit of our model. All values for the variance inflation factors are less than 10, indicating absence of collinearity among the remaining variables         |
| Liu 2006             | Coagulation times                                                                         | Derivation                    | Other (Acute Liver Failure)                | varied: Peak values during admission                                                                      | Mortality                                          | AUROC: composite score including INR, bilirubin and ammonia had AUROC 0.905 for mortality, composite score with PT, bilirubin and ammonia had AUROC of 0.885                                                                                                                                                                                                                                                                                                                                          |
| Lu 2008              | Coagulation times                                                                         | Validation                    | Other (Acute Liver Failure)                | varies: peak level during admission                                                                       | Mortality                                          | AUROC: composite variable including PT, bilirubin and ammonia had AUROC 0.806. The C index was 80.6 (95% CI, 65.7-95.3). Composite variable with INR, bilirubin and ammonia had AUROC of 0.86. The C index was 86.3 (95% CI, 75.6-97.4).                                                                                                                                                                                                                                                              |
| Lu 2013              | Coagulation times                                                                         | Validation                    | Other (Acute Liver Failure)                | study entry which was when criteria for ALF were met, and then peak level within 7 days after study entry | Mortality, Other (liver transplant)                | AUROC: For LUI score (LIU = $3.507 \times$ peak total bilirubin (mg/dL) + $45.51 \times$ peak INR (seconds) + $0.254 \times$ peak ammonia ( $\mu$ mol/L)), AUROC =0.81, (CI 0.78-0.85, p<0.0001). Same score using admission values AUROC=0.76 (CI 0.72-0.79, p<0.0001)                                                                                                                                                                                                                               |
|                      |                                                                                           |                               |                                            |                                                                                                           |                                                    |                                                                                                                                                                                                                                                                                                                                                                                                                                                                                                       |
| McDiarmid 2002       | Coagulation times<br>Other (multiple serum chemistries including total bilirubin albumin) | Other (chronic liver failure) |                                            | Mortality, Other (move to ICU)                                                                            |                                                    | Other: INR found to be predictive of both endpoints on multivariate analysis; included in the all scoring systems compared                                                                                                                                                                                                                                                                                                                                                                            |
| Patregnani 2012      | Coagulation times<br>Platelet count                                                       |                               | Trauma                                     | on admission                                                                                              | Mortality                                          | Other: % mortality, descriptive statistics; coagulopathy defined as INR $\geq$ 1.5                                                                                                                                                                                                                                                                                                                                                                                                                    |
| Podolsky-Gondim 2018 | Coagulation times<br>Platelet count                                                       | Derivation                    | Trauma, Other (TBI requiring neurosurgery) | at admission                                                                                              | Mortality, Functional outcomes /residual morbidity | aOR: Fibrinogen (mg/dL) for worse GOS score at one month 0.96 0.8-0.9 and at 6 months 0.97 0.8-0.9 Prothrombin Time for worse GOS score at one month 16.4 0.8-321 and at 6 months 24.4 1.1-506 aPTT* for worse GOS score at one month 2.18 0.5-8.8 and at 6 months 2.37 0.5-9.7 Thrombocyte (count) for worse GOS score at one month 0.99 0.9-1.0 and at 6 months 0.99 0.9-1.0 0.                                                                                                                     |

|                      |                                                                                                   |            |                                                                       |                                                                                                              |                                                             |                                                                                                                                                                                                                                                                                                                                                                                                                                                                                                                                                                                                                                                                                                                                                                                                                                  |
|----------------------|---------------------------------------------------------------------------------------------------|------------|-----------------------------------------------------------------------|--------------------------------------------------------------------------------------------------------------|-------------------------------------------------------------|----------------------------------------------------------------------------------------------------------------------------------------------------------------------------------------------------------------------------------------------------------------------------------------------------------------------------------------------------------------------------------------------------------------------------------------------------------------------------------------------------------------------------------------------------------------------------------------------------------------------------------------------------------------------------------------------------------------------------------------------------------------------------------------------------------------------------------|
| Ranucci 2019         | Coagulation times<br>Other (ROTEM)                                                                | Derivation | PCICU population<br>(only cardiac)                                    | prior to cardiac surgery<br>(baseline), after<br>protamine, on arrival in<br>PICU, after 24 hours in<br>PICU | Other (severe<br>bleeding ><br>30ml/kg/24 hours)            | Se: INR cut-off value at an INR of 1.47 had a sensitivity of 50%<br>fibrinogen levels 150 mg dL-1 had sensitivity of 52%,<br>Sp: INR cut-off value at an INR of 1.47 specificity of 91% for SB<br>fibrinogen levels 150 mg dL-1 a specificity of 85%,<br>PPV: INR cut-off value at an INR of 1.47 PPV of 69%.fibrinogen levels<br>150 mg dL-1 PPV of 60% for SB.<br>NPV: INR cut-off value at an INR of 1.47 had NPV of 81% ;fibrinogen<br>levels 150 mg dL-1 an NPV of 81%<br>AUROC: INR had an AUROC of 0.826 (95% confidence interval =<br>0.721-0.904); The fibrinogen levels had an AUROC of 0.770 (95%<br>confidence interval = 0.660-0.858); the (best) cut-off value was 150<br>mg dL-1, . combined INR and fibrinogen had an AUROC of 0.867<br>Youden's index: fibrinogen levels 150 mg dL-1 (Youden's index =<br>0.37) |
| Srivastava 2012      | Coagulation times                                                                                 |            | Other (acute<br>hepatic failure with<br>or without<br>encephalopathy) | admission to study<br>w/subsequent interval not<br>specified; highest value of<br>PT used for analysis       | Mortality,Function<br>al outcomes<br>/residual<br>morbidity | Other: descriptive statistics comparing survivors to non-survivors;<br>PT>=40.5s assoc w/increased mortality (p<0.0001)                                                                                                                                                                                                                                                                                                                                                                                                                                                                                                                                                                                                                                                                                                          |
| TudeMelo 2010        | Coagulation times                                                                                 |            | Trauma                                                                | on admission                                                                                                 | Mortality                                                   | aOR: "coagulopathy" (defined as 2x lab control) OR mortality=3.10<br>(95% CI: 1.05-9.18)                                                                                                                                                                                                                                                                                                                                                                                                                                                                                                                                                                                                                                                                                                                                         |
| Yang 2019            | Coagulation times                                                                                 | Derivation | Other (venoarterial<br>ECMO)                                          | 24 hour after ECMO<br>initiation                                                                             | Mortality                                                   | Other: hazard ratio : Pt > 6 seconds prolonged in multivariate analysis<br>for 30 day mortality : 3.013 (1.126, 8.061)                                                                                                                                                                                                                                                                                                                                                                                                                                                                                                                                                                                                                                                                                                           |
| C -<br>Fibrinogen    |                                                                                                   |            |                                                                       |                                                                                                              |                                                             |                                                                                                                                                                                                                                                                                                                                                                                                                                                                                                                                                                                                                                                                                                                                                                                                                                  |
| Couto-<br>Alves 2013 | Coagulation times<br>Platelet count Other<br>(Fibrinogen level)                                   | Derivation | Other<br>(meningococcal<br>sepsis)                                    | first recorded sample                                                                                        | Mortality                                                   | LR: composite of base excess and platelet count LR test p<0.001,<br>Hosmer-Lemeshow chi square test=20.2, p=0.009<br>Goodness of fit: composite of base excess and platelet count<br>goodness of fit Nagelkerke pseudo-R2 =0.3 and Brier score =0.046.<br>Calibration of the BEP score on the entire consortium dataset shows a<br>relatively small underestimation of the probability of death for BEP ><br>0.3 (the mean absolute error is 0.025 and the 0.9 quantile of the<br>absolute error is only 0.066                                                                                                                                                                                                                                                                                                                   |
| Ersoy 2007           | Platelet count<br>Coagulation factor<br>concentration or<br>activity Other (AT<br>and fibrinogen) | Derivation | Sepsis                                                                | not clear- at time of<br>diagnosis of sepsis                                                                 | Mortality                                                   | Se: AT level of 15mg/dl=92.3%, fibrinogen level of 150mg/dL =92.3%<br>Sp: AT level of 15mg/dl =61.9%, fibrinogen level of 150mg/dL =80.9%<br>PPV: AT level of 15mg/dl =60.0%, fibrinogen level of 150mg/dL =25%<br>NPV: AT level of 15mg/dl =92.8%, fibrinogen level of 150mg/dL<br>=61.7%<br>aOR: platelet count was not significant for mortality, AT level had OR<br>0.54, CI 0.37-0.96, p=0.002 for mortality                                                                                                                                                                                                                                                                                                                                                                                                                |
| Faraoni 2014         | Other (fibrinogen)                                                                                | Derivation | PCICU population<br>(only cardiac)<br>Other (CPB)                     | 10 minutes after<br>protamine administration                                                                 | Other<br>(postoperative<br>bleeding)                        | Se: Fibrinogen <1.5g/L -->68.9%, FIBTEM MCF <3mm-->78.6%<br>Sp: Fibrinogen <1.5g/L -->83.8%, FIBTEM MCF <3mm-->70%<br>AUROC: fibrinogen level AUROC 0.78, CI 0.70-0.85), for FIBTEM<br>MCF AUROC 0.73, (CI 0.63-0.81)<br>aOR: for fibrinogen level OR 0.97 (CI 0.95-0.99, p=0.006)                                                                                                                                                                                                                                                                                                                                                                                                                                                                                                                                               |
| Graciano 2005        | Coagulation times<br>Platelet count Other<br>(fibrinogen)                                         | Derivation | General PICU<br>population (only<br>non-cardiac)                      | worst value throughout<br>PICU stay                                                                          | Mortality                                                   | Other: Correlation between hematologic dysfunction, quantified using<br>the worst fibrinogen level (mol/L), and the pediatric intensive care unit<br>mortality rate. R =0.98, p =.0035                                                                                                                                                                                                                                                                                                                                                                                                                                                                                                                                                                                                                                           |
| Huang 2011           | Coagulation times<br>Platelet count Other<br>(fibrinogen)                                         |            | Sepsis Other<br>(acalculous<br>cholecystitis)                         | at time of diagnosis                                                                                         | Mortality                                                   | Other: descriptive statistics comparing survivors vs non-survivors; p-<br>value determined                                                                                                                                                                                                                                                                                                                                                                                                                                                                                                                                                                                                                                                                                                                                       |

|              |                                                                                                   |                         |                                               |                                                  |                                                                                                                                  |                                                                                                                                                                                                                                                                                                                                                                                                                                                                                                                                                                                                                                                                                                                                                                                                                                                                                       |
|--------------|---------------------------------------------------------------------------------------------------|-------------------------|-----------------------------------------------|--------------------------------------------------|----------------------------------------------------------------------------------------------------------------------------------|---------------------------------------------------------------------------------------------------------------------------------------------------------------------------------------------------------------------------------------------------------------------------------------------------------------------------------------------------------------------------------------------------------------------------------------------------------------------------------------------------------------------------------------------------------------------------------------------------------------------------------------------------------------------------------------------------------------------------------------------------------------------------------------------------------------------------------------------------------------------------------------|
| Jevtic 2010  | Coagulation times<br>Coagulation factor concentration or activity Other (AT FVIII vWF fibrinogen) | Other (post-HSCT w/VOD) | day 0, 1, 7, 14                               | Other (development of VOD)                       |                                                                                                                                  | Other: descriptive                                                                                                                                                                                                                                                                                                                                                                                                                                                                                                                                                                                                                                                                                                                                                                                                                                                                    |
| Malley 1996  | Coagulation times<br>Platelet count Other (fibrinogen)                                            | Derivation              | Sepsis Other (invasive meningococcal disease) | upon admission                                   | Other (Adverse outcome was defined as death during hospitalization, limb amputation, or loss of all five digits on an extremity) | Se: In validation data: 2 of 3 factors (ANC < 3K, fibrinogen<250 mg/dl or platelet count <150K) was 82% Model using ANC<3K and fibrinogen <250mg/dl was 89%<br>Sp: In validation data: 2 of 3 factors (ANC < 3K, fibrinogen<250 mg/dl or platelet count <150K) was 97% Model using ANC<3K and fibrinogen <250mg/dl was 97%<br>PPV: In validation data: 2 of 3 factors (ANC < 3K, fibrinogen<250 mg/dl or platelet count <150K) was 82% Model using ANC<3K and fibrinogen <250mg/dl was 89%<br>NPV: In validation data: 2 of 3 factors (ANC < 3K, fibrinogen<250 mg/dl or platelet count <150K) was 97% Model using ANC<3K and fibrinogen <250mg/dl was 97%<br>aOR: PT >20s and PTT >60 sec were not significantly associated with adverse outcomes. Platelet count < 150K had aOR 6.2 (CI 1-36, p=0.04), and fibrinogen <250mg/dl had OR 42.7 (CI 4-460, p=0.002) for adverse outcome |
| McManus 1993 | Coagulation times                                                                                 |                         | Sepsis Other (SIRS)                           | at presentation, 1st 24hrs of care, at discharge | Mortality, Outcomes related to MODS                                                                                              | Se: FBGN=81%; aPTT=95%<br>Sp: FBGN=95%; aPTT=90%<br>PPV: FBGN=93%; aPTT=86%<br>NPV: FBGN=88%; aPTT=97%<br>Other: Coagulopathy (defined as a partial thromboplastin time > 50 secs or serum fibrinogen concentration < 150 mg/dL [4.4 mmol/L]) at the referral site or on ICU admission was identified as an excellent predictor of poor outcome: sensitivity, specificity, positive and negative predictive values of a low serum fibrinogen value, being 81%, 95%, 93%, and 88%, and of prolonged partial thromboplastin time, being 95%, 90%, 86%, and 97%, respectively.                                                                                                                                                                                                                                                                                                           |
| Mitra 2017   | Coagulation times<br>Platelet count                                                               |                         | Sepsis                                        |                                                  | Mortality, Other (DIC)                                                                                                           | Se: 70.8%<br>Sp: 82.7%<br>PPV: 72.3%<br>NPV: 81.6%<br>Other: Plasma fibrinogen level was found to be significantly higher among neonates with sepsis when compared to neonates in control group (p < 0.0001). It had sensitivity of 70.8 %, specificity of 82.7 %, positive predictive value (PPV) of 72.3 % and negative predictive value (NPV) of 81.6 % for diagnosis of neonatal sepsis at cut-off value of 301.90 mg/dL. When neonates with septic shock and/or disseminated intravascular coagulation (DIC) were excluded from study population, sensitivity and NPV rose to 91.9 % and 95.4 % at the same cut-off value while specificity and PPV remained the same. Lower level of plasma fibrinogen was detected in neonates with septic shock and/or DIC (p < 0.0001) and in neonates who died (p < 0.0001).                                                                |

|                      |                                                                              |                                 |                                                                 |                                                                                                                |                                                    |                                                                                                                                                                                                                                                                                                                                                                                                                                                                                                                                                                                                                                                                                                                                                                                                  |
|----------------------|------------------------------------------------------------------------------|---------------------------------|-----------------------------------------------------------------|----------------------------------------------------------------------------------------------------------------|----------------------------------------------------|--------------------------------------------------------------------------------------------------------------------------------------------------------------------------------------------------------------------------------------------------------------------------------------------------------------------------------------------------------------------------------------------------------------------------------------------------------------------------------------------------------------------------------------------------------------------------------------------------------------------------------------------------------------------------------------------------------------------------------------------------------------------------------------------------|
| Niederwanger 2018    | Coagulation times<br>Platelet count                                          |                                 | Sepsis                                                          | time of peak CRP                                                                                               | Mortality                                          | AUROC: The ROC analysis for survival predicted by fibrinogen, platelets and aPTT resulted in an AUROC of 0.74 (0.63-0.85), 0.71 (0.63-0.79) and 0.81 (0.73- 0.90), respectively.<br>aOR: increase of 100 mg/dl in fibrinogen increases the survival chance by 26%, OR 1.35 (1.04 to 1.82) per 50 G/l platelets by 48.4% 1.94 (1.3 to 3.29) , and aPTT prolongation of 10 s increases the mortality risk by 20.8% 0.83 (0.69 to 0.96) . Patients presenting with hypofibrinogenemia have a significantly higher mortality rate than do patients with normo- or hyperfibrinogenemia: OR 28.42 (5.42-284.81), $p < 0.0001$ .                                                                                                                                                                        |
| Podolsky-Gondim 2018 | Coagulation times<br>Platelet count                                          | Derivation                      | Trauma, Other (TBI requiring neurosurgery)                      | at admission                                                                                                   | Mortality, Functional outcomes /residual morbidity | aOR: Fibrinogen (mg/dL) for worse GOS score at one month 0.96 0.8-0.9 and at 6 months 0.97 0.8-0.9 Prothrombin Time for worse GOS score at one month 16.4 0.8-321 and at 6 months 24.4 1.1-506 aPTT* for worse GOS score at one month 2.18 0.5-8.8 and at 6 months 2.37 0.5-9.7 Thrombocyte (count) for worse GOS score at one month 0.99 0.9-1.0 and at 6 months 0.99 0.9-1.0 0.                                                                                                                                                                                                                                                                                                                                                                                                                |
| Ranucci 2019         | Coagulation times<br>Other (ROTEM)                                           | Derivation                      | PCICU population (only cardiac)                                 | prior to cardiac surgery (baseline), after protamine, on arrival in PICU, after 24 hours in PICU               | Other (severe bleeding > 30ml/kg/24 hours)         | Se: INR cut-off value at an INR of 1.47 had a sensitivity of 50% fibrinogen levels 150 mg dL-1 had sensitivity of 52%, Sp: INR cut-off value at an INR of 1.47 specificity of 91% for SB fibrinogen levels 150 mg dL-1 a specificity of 85%, PPV: INR cut-off value at an INR of 1.47 PPV of 69%. fibrinogen levels 150 mg dL-1 PPV of 60% for SB.<br>NPV: INR cut-off value at an INR of 1.47 had NPV of 81% ;fibrinogen levels 150 mg dL-1 an NPV of 81%<br>AUROC: INR had an AUROC of 0.826 (95% confidence interval = 0.721-0.904); The fibrinogen levels had an AUROC of 0.770 (95% confidence interval = 0.660-0.858); the (best) cut-off value was 150 mg dL-1, . combined INR and fibrinogen had an AUROC of 0.867 Youden's index: fibrinogen levels 150 mg dL-1 (Youden's index = 0.37) |
| Tirosch-Wagner 2011  | Coagulation times<br>Other (Rotating Cone Platelet Analyzer (CPA) and ROTEM) | PCICU population (only cardiac) | T1=pre-op, T2=post-bypass admit to PICU, T3=24hr post-op/bypass | Other patient-centered outcomes, Other (aim is to identify patients at risk for bleeding/who ultimately bleed) |                                                    | Other: incidence of bleeding assoc with low pre-op wt, longer bypass time and lower core temp; elevated PT and low fibrinogen pre-op identifies patients at risk for bleeding but not mortality; decreased Max Clot Firmness (ROTEM) post-by-pass predictive of patients who bleed; CPA not predictive of bleeding                                                                                                                                                                                                                                                                                                                                                                                                                                                                               |
| <b>D – D-dimer</b>   |                                                                              |                                 |                                                                 |                                                                                                                |                                                    |                                                                                                                                                                                                                                                                                                                                                                                                                                                                                                                                                                                                                                                                                                                                                                                                  |
| Chen 2017            | Other (D-dimers)                                                             | Validation                      | Sepsis                                                          | PICU day 1                                                                                                     | Mortality                                          | Se: composite of D-dimers, BNP, albumin, bilirubin, and ventilation within 24 hours 0.857<br>Sp: composite of D-dimers, BNP, albumin, bilirubin, and ventilation within 24 hours 0.677<br>AUROC: composite of D-dimers, BNP, albumin, bilirubin, and ventilation within 24 hours : training set AUROC 0.854 (CI 0.826-0.881) and validation AUROC 0.844 (CI 0.816-0.873)<br>Goodness of fit: composite of D-dimers, BNP, albumin, bilirubin, and ventilation within 24 hours $\chi^2=6.766$ , $p=0.562$                                                                                                                                                                                                                                                                                          |

|                        |                                                 |            |                                                 |                                                                                |                                |                                                                                                                                                                                                                                                                                                                                                                                                                                                                                                                                                                                                                                                                                        |
|------------------------|-------------------------------------------------|------------|-------------------------------------------------|--------------------------------------------------------------------------------|--------------------------------|----------------------------------------------------------------------------------------------------------------------------------------------------------------------------------------------------------------------------------------------------------------------------------------------------------------------------------------------------------------------------------------------------------------------------------------------------------------------------------------------------------------------------------------------------------------------------------------------------------------------------------------------------------------------------------------|
| Foad 2014              | Other (D-dimers)                                | Derivation | Trauma Other (TBI)                              | Day 1, 3 and 14 of admission                                                   | Mortality                      | Se: D-dimer Day 1 of 10.5 =89.5%, D-dimer of 3.6 on Day 3=84.2%, D-dimer of 1.1 on Day 14=73.7%<br>Sp: D-dimer Day 1 of 100%, D-dimer of 3.6 on Day 3=92.6%, D-dimer of 1.1 on Day 14=81.5%<br>PPV: D-dimer of 3.6 on Day 3=89.3%, D-dimer of 1.1 on Day 14=73.7%<br>NPV: D-dimer Day 1 of 93.1%, D-dimer of 3.6 on Day 3=89.3%, D-dimer of 1.1 on Day 14=81.5%<br>AUROC: D-dimer 0.936, 0.930 and 0.784 with 95% CI (0.836 - 1.00, 0.836 - 1.00 and 0.640 - 0.927) respectively.                                                                                                                                                                                                      |
| Oren 2005              | Coagulation times<br>Platelet count DIC         |            | Other (DIC)                                     | at time of diagnosis w/subsequent interval not specified                       | Mortality                      | Other: descriptive statistics comparing survivors vs non-survivors for each parameter - calculating p-value; none of the measured lab parameters (Hb, WBC, PLT, PT, aPTT, FBGN, D-dimer, FDPs) predicted mortality                                                                                                                                                                                                                                                                                                                                                                                                                                                                     |
| Qi 2014                | Coagulation times<br>Other (procalcitonin)      |            | Other (SIRS)                                    | admission to study w/subsequent interval not clear - manuscript NOT in English | Mortality                      | AUROC: AUROC (procalcitonin)=0.875; OR=1.684, p<0.01; AUROC (D-dimer)=0.872; OR=1.003, p<0.01                                                                                                                                                                                                                                                                                                                                                                                                                                                                                                                                                                                          |
| Wang 2012              | Coagulation times<br>Other (soluble P-selectin) |            | Other (severe pneumonia)                        | on admission                                                                   | Mortality                      | Se: D-dimer 0.7mg/dL: 90.5%; P-selectin 94.0mcg/L: 82.4%<br>Sp: D-dimer 0.7mg/L: 90.5%; P-selectin 94.0mcg/L: 88.7%; for both together: 90.2%                                                                                                                                                                                                                                                                                                                                                                                                                                                                                                                                          |
| <b>E - Other</b>       |                                                 |            |                                                 |                                                                                |                                |                                                                                                                                                                                                                                                                                                                                                                                                                                                                                                                                                                                                                                                                                        |
| Baslaim 2006           | DIC                                             | Derivation | PCICU population (only cardiac)<br>Other (ECMO) |                                                                                | Mortality                      | Other: only reported p value for univariate analysis, DIC occurred in all 8 children who died compared to 0 deaths in those without DIC, p =0.002                                                                                                                                                                                                                                                                                                                                                                                                                                                                                                                                      |
| ElBassetAb oElEzz 2017 | Other (vWF antigen)                             | Derivation | General PICU population (only non-cardiac)      | day 1 and day 3 of admission                                                   | Mortality                      | Se: Day 1 VWF Antigen level: 94.2; Day 3 VWF Antigen level: 93.4%<br>Sp: Day 1 VWF Antigen level: 83.1%; Day 3 VWF Antigen level: 81.7%<br>AUROC: Day 1 VWF Antigen level: 0.942; Day 3 VWF Antigen level: 0.934<br>aOR: vWF Ag levels at day 1: 6.56 (CI 0.45- 0.96), p value 0.05                                                                                                                                                                                                                                                                                                                                                                                                    |
| Faraoni 2015           | Other (ROTEM CT A10 A20 MCF)                    | Derivation | PCICU population (only cardiac)<br>Other (CPB)  | 10 minutes after protamine administration at end of cpb                        | Other (postoperative bleeding) | Se: CT >111s --> 60%, EXTEM A10 <38mm--> 88%, FIBTEM A10<3mm-->85%, ROTEM probability score >0.2-->93% (CI 0.77-0.99)<br>Sp: CT >111s --> 74%, XTEM A10 <38mm--> 52%, FIBTEM A10<3mm-->62%, ROTEM probability score >0.2-->33% (CI 0.19-0.51)<br>PPV: ROTEM probability score >0.2-->53% (CI 0.38-0.67)<br>NPV: ROTEM probability score >0.2-->86% (CI 0.57-0.98)<br>AUROC: EXTEM CT AUROC 0.67, CI 0.59-0.75, p<0.0001; EXTEM A10 AUROC 0.74, CI 0.66-0.81, p<0.001, A20 (AUROC 0.76, CI 0.69-0.83; p<0.001, MCF (AUROC 0.76, CI 0.68-0.83, p<0.001, FIBTEM A10 (AUROC 0.72, CI 0.64-0.80, p<0.001); A20 (AUROC 0.73, CI 0.65-0.81, p<0.001); MCF (AUROC 0.74, CI 0.66-0.82, p<0.001) |
| Jhang 2018             | DIC                                             | Validation | Sepsis                                          | within 12 hours of admission                                                   | Mortality                      | AUROC: 28 day mortality: the JAAM DIC score was 0.765 (95% CI: 0.648-0.882), modified JAAM DIC score was 0.741 (95% CI: 0.625-0.857), and the ISTH DIC score was 0.679 (95% CI: 0.534-0.823)<br>aOR: Mortality: JAAM DIC score aOR 1.55 (CI 1.08-2.21) p value 0.017 Modified JAAM DIC score aOR 1.40 (CI 1.02-1.94) p value 0.040                                                                                                                                                                                                                                                                                                                                                     |

|                 |                                                                                                                                                                                                                                                               |            |                                                                       |                                                        |                                                                                                                                                                                                                             |                                                                                                                                                                                                                                                                                                                                                                                                                         |
|-----------------|---------------------------------------------------------------------------------------------------------------------------------------------------------------------------------------------------------------------------------------------------------------|------------|-----------------------------------------------------------------------|--------------------------------------------------------|-----------------------------------------------------------------------------------------------------------------------------------------------------------------------------------------------------------------------------|-------------------------------------------------------------------------------------------------------------------------------------------------------------------------------------------------------------------------------------------------------------------------------------------------------------------------------------------------------------------------------------------------------------------------|
| Leeper 2017     | Other (TEG LY30 classify as shutdown (SD) normal or hyperfibrinolytic (HF))                                                                                                                                                                                   | Derivation | Trauma                                                                | at initial trauma assessment in ED                     | Mortality,Functional outcomes /residual morbidity,Other (DVT- only unadjusted analysis: Shutdown was significantly associated with incidence of DVT compared with either HF ( p = 0.048) or normal physiology ( p = 0.002)) | Youden's index: LY30 of 0.8 showed the strongest correlation for both mortality and for poor outcome (mortality plus disability)                                                                                                                                                                                                                                                                                        |
| Leeper 2018     | Other (TEG used to define fibrinolysis shutdown (LY30 < 0.9%))                                                                                                                                                                                                | Derivation | Trauma Other (please specify)                                         | within 24 hours admission                              | Mortality                                                                                                                                                                                                                   | aOR: There was a dose response with an OR of 1.18, meaning that for every mL/kg plasma, there was an associated 18% increased odds of sustained SD<br>Other: Plasma transfusion was independently associated with sustained fibrinolysis SD after controlling for severe TBI. Patients with both severe TBI and sustained fibrinolysis SD had poor outcome (75% mortality and 100% functional disability in survivors). |
| Lin 2017        | Other (thrombomodulin)                                                                                                                                                                                                                                        |            | Sepsis                                                                | Days 1 and 3 PICU                                      | Mortality,Other (DIC, development of MODS)                                                                                                                                                                                  | AUROC: day 1 serum thrombomodulin levels had good discriminative power in predicting the development of DIC (AUROC = 0.881, cut-off point 5.71 mU/ml), multiple organ dysfunction syndrome (MODS) (AUROC = 0.740, cut-off point 4.71 mU/ml), and mortality (AUROC = 0.863, cut-off point 5.95 mU/ml).                                                                                                                   |
| Liras 2015      | Other (TEG LY-30 (clot lysis at 30 minutes))                                                                                                                                                                                                                  | Derivation | Trauma                                                                | ED trauma room                                         | Mortality                                                                                                                                                                                                                   | aOR: LY-30 > or equal to 3% has aOR 6.2 (CI 2.465-16.269, p <0.001)                                                                                                                                                                                                                                                                                                                                                     |
| Liras 2017      | Other (TEG coagulopathy: The r-TEG values used to define coagulopathy (coagulopathic) were the presence of any of the following: activated clotting time >128 seconds a-angle 65 degrees maximum amplitude 55 mm lysis 30 minutes after maximum amplitude>3%) | Derivation | Trauma                                                                | Trauma activation in ED                                | Mortality                                                                                                                                                                                                                   | OR: simple logistic (unadjusted) model, coagulopathy had an odds ratio of 3.4 for 30-day mortality (95% CI 0.94 to 15.68; p ¼ 0.094).                                                                                                                                                                                                                                                                                   |
| Moxon 2015      | DIC Other (soluble thrombomodulin)                                                                                                                                                                                                                            |            | Other (cerebral malaria)                                              | admission to study w/subsequent interval not specified | Mortality                                                                                                                                                                                                                   | aOR: AUROC retinoparetinopathy (+) cerebral malaria OR=3.068 (95%CI: 1.085-8.609; p=0.035) vs non-fatal cerebral malaria; soluble thrombomodulin independ assoc with fatal outcome (OR=1.084 for each mg/mL increase (95%CI: 1.017-1.156)                                                                                                                                                                               |
| Oladunjoye 2018 | Coagulation times Other (anti-FXa)                                                                                                                                                                                                                            | Derivation | PCICU population (only cardiac) Other (post cardiac surgery receiving | daily                                                  | Other (major and clinically relevant non-major bleeding events                                                                                                                                                              | aOR: there was no association as long as aPTT was below 150 seconds (OR, 0.92; 95% CI, 0.77-1.10; P = .35). When aPTT exceeded 150 seconds, the odds of major or clinically relevant nonmajor bleeding doubled with each 10-second increase (OR, 1.72;                                                                                                                                                                  |

|                      |                                                                                             |                                    |                                                                                                                                                                                                       |                                                      |                                                                                                                                   |                                                                                                                                                                                                                                                              |
|----------------------|---------------------------------------------------------------------------------------------|------------------------------------|-------------------------------------------------------------------------------------------------------------------------------------------------------------------------------------------------------|------------------------------------------------------|-----------------------------------------------------------------------------------------------------------------------------------|--------------------------------------------------------------------------------------------------------------------------------------------------------------------------------------------------------------------------------------------------------------|
|                      |                                                                                             |                                    | therapeutic anticoagulation with UFH)                                                                                                                                                                 |                                                      | during treatment with therapeutic UFH)                                                                                            | 95% CI, 1.21-2.42; P = 0.003; Anti-Xa did not correlate with major or clinically relevant nonmajor bleeding (OR, 1.11 per 0.1 IU/mL increase; 95% CI, 0.89-1.29; P ¼ .34), and no significant thresholds were identified using piecewise regression modeling |
| Padungma neesub 2019 | DIC Other (DIC plus AT levels; DIC plus protein C levels ; DIC plus thrombomodulin levels ) | Derivation                         | General PICU population (mixed cardiac and non-cardiac)                                                                                                                                               | after 1 day in PICU (>24hours)                       | Mortality,Other (bleeding and clotting events)                                                                                    | AUROC: bleeding and ISTH DIC score (AUROC = 0.732), ISTH DIC score plus PC (AUROC = 0.72), ISTH score plus AT (AUROC = 0.751) and ISTH DIC score plus AT and PC (AUROC = 0.738)                                                                              |
| Rajkumar 2017        | Coagulation times Other (Sonoclot POC testing)                                              |                                    | Other (post-cardiac surgery)                                                                                                                                                                          | pre-CBP, post-CBP, hr 4                              | Other (postoperative bleeding)                                                                                                    | AUROC: AUROC for Sonoclot glass bead plt fxn strongest predictor of post-op bleeding: AUROC=0.725 (95%CI: 0.619-0.831)                                                                                                                                       |
| Rajpurkar 2019       | DIC                                                                                         | Derivation                         | Other (patients enrolled in COG AAML0631 clinical trial open to patients age 2 to below 22 years with previously untreated APL confirmed by PML-RARA reverse transcription polymerase chain reaction) | during induction therapy                             | Mortality,Other (bleeding or clotting outcomes)                                                                                   | Se: ISTH DIC score ≥ 6 in predicting patients experiencing at least 1 lethal or nonlethal coagulopathy event during induction was 70.6% (95% CI, 44.0%–89.7%)<br>Sp: 64.5% (95% CI, 51.3%–76.3%)                                                             |
| Schmidt 2018         | Other (oxygen reduction potential (ORP))                                                    | Derivation                         | Other (CPB)                                                                                                                                                                                           | pre CPB, post CPB, 6 hrs post CPB, 12 hours post CPB | Other (infection and thrombosis)                                                                                                  | Other: descriptive p values showing reduced ORP at 6 and 12 hours post CPB was associated with increased rates of infection and thrombosis 0.002 and 0.0007 respectively.                                                                                    |
| Schneider 2011       | Other (soluble thrombomodulin activity and ag procoagulant plasma phospholipids)            | Other (post-BMT (8 auto, 16 allo)) | 1 week pre-BMT then                                                                                                                                                                                   | Mortality,Other (BMT complications)                  |                                                                                                                                   | Other: descriptive statistics regarding relative incidence of outcome; TM activity/TM ag ration decreased in patients with "poor outcome" (p<0.05); PPL decreased in "poor outcome"                                                                          |
| Schochl 2011         | Coagulation times Other (ROTEM)                                                             |                                    | Trauma                                                                                                                                                                                                | on admission                                         | Mortality,Other (compared coagulation test with ROTEM as predictor for mortality: best predictors were: aPTT and ROTEM FIBEM MCF) | AUROC: mortality: aPTT: 0.79(95% CI: 0.686-0.868; p<0.001); MCF: 0.77(95% CI: 0.665-0.850; p<0.001)                                                                                                                                                          |
| Selim 2005           | Other (soluble Fibrin Monomer complex)                                                      |                                    | Sepsis                                                                                                                                                                                                | dx/suspicion of sepsis                               | Mortality,Other (development of DIC)                                                                                              | Se: sFM cutoff of 48.5mg/L: 100% predictor of DIC<br>Sp: sFM cutoff of 48.5mg/L: 93% predictor of DIC                                                                                                                                                        |
| Selladurai 1997      | Coagulation times Other (DIC score determined from: PT aPTT FBGN PLT count FDPs TCT)        | Derivation                         | Trauma                                                                                                                                                                                                | admission; subsequent testing not identified         | Mortality                                                                                                                         | Other: derived DIC score along with aPTT & FDPs (components of DIC score) associated with CGS                                                                                                                                                                |



|               |                                                                                                                                       |                                                         |                                                                          |                                                         |                                                                                              |                                                                                                                                                                                                                                                                           |
|---------------|---------------------------------------------------------------------------------------------------------------------------------------|---------------------------------------------------------|--------------------------------------------------------------------------|---------------------------------------------------------|----------------------------------------------------------------------------------------------|---------------------------------------------------------------------------------------------------------------------------------------------------------------------------------------------------------------------------------------------------------------------------|
| Thebaud 1999  | DIC                                                                                                                                   |                                                         | Other (Hemorrhagic Shock Encephalopathy Syndrome)                        | admission to study w/subsequent interval not identified | Mortality,Functional outcomes /residual morbidity,Organ-specific outcomes/residual morbidity | Other: descriptive statistics (i.e., % of patients with mortality or poor outcome)                                                                                                                                                                                        |
| Tzanetos 2012 | Coagulation times<br>Coagulation factor concentration or activity Other (urinary thromboxane thrombin-AT complex soluble CD40 Ligand) | Other (cardiac surgery for single ventricle physiology) | day 0, POD 1,3,5                                                         | Other (thrombus formation)                              |                                                                                              | Other: % developing thrombus: lower AT (p=0.01), higher tPA ag (p=0.02) day#0; increased difference vs "no thrombus" cohort over time - AT p=0.002, tPA ag p=0.005                                                                                                        |
| Vogel 2013    | Coagulation times<br>Other (TEG)                                                                                                      |                                                         | Trauma                                                                   | on admission                                            | Other (transfusion of blood products)                                                        | aOR: on multivariate analysis ACT, R-value, k-time, alpha-angle, MA all predicted RBC or plasma transfusion w/in 6hrs; MA predicted initiation of life sustaining intervention (OR=0.82; 95% CI: 0.70-0.96; p=0.018); all TEG parameters except LYS30 predicted mortality |
| Zavadil 1998  | Coagulation times<br>Other (TEG)                                                                                                      |                                                         | Other (ECMO)                                                             | pre-ECMO                                                | Other (bleeding; noted more often in patients assigned to HEM group (per ELSO criteria))     | Other: descriptive statistics comparing HEM vs non-HEM cohorts for risk of bleeding; p-value determined                                                                                                                                                                   |
| Zinter 2016   | Coagulation factor concentration or activity Other (angiopoietin-2)                                                                   | General PICU population (mixed cardiac and non-cardiac) | days 1&3                                                                 | Mortality                                               |                                                                                              | aOR: day1 angiopoietin OR for mortality=3.6 (1.1-12.1) and for increasing angio-2 from day1-d3: OR 3.3 (1.2-9.2)                                                                                                                                                          |
| Zubair 2015   | Other (PFA-100)                                                                                                                       |                                                         | PCICU population (only cardiac)<br>Other (pre-operative cardiac surgery) | testing w/in 30d of surgery                             | Mortality,Other (platelet function by PFA-100)                                               | Kaplan-Meier                                                                                                                                                                                                                                                              |

Abbreviations: Se, sensitivity; Sp, specificity; PPV, positive predictive value; NPV, negative predictive value; LR, likelihood ratio; AUROC, area under the receiver operating characteristics curve; aOR, adjusted odds ratio; PICU, pediatric intensive care unit; PCICU, pediatric cardiac intensive care unit; AT, antithrombin; anti-FXa, anti-factor Xa; POD, postoperative day

1. Agrawal S, Sachdev A, Gupta D, Chugh K. Platelet counts and outcome in the pediatric intensive care unit. *Indian journal of critical care medicine : peer-reviewed, official publication of Indian Society of Critical Care Medicine*. 2008;12(3):102-8.
2. Algren JT, Lal S, Cutliff SA, Richman BJ. Predictors of outcome in acute meningococcal infection in children. *Crit Care Med*. 1993;21(3):447-52.
3. Anton-Martin P, Journeycake J, Modem V, et al. Coagulation profile is not a predictor of acute cerebrovascular events in pediatric extracorporeal membrane oxygenation patients. *ASAIO J*. 2017;63(6):793-801.
4. Baslaim G, Bashore J, Al-Malki F, Jamjoom A. Can the outcome of pediatric extracorporeal membrane oxygenation after cardiac surgery be predicted? *Ann Thorac Cardiovasc Surg*. 2006;12(1):21-7.
5. Borgman MA, Maegele M, Wade CE, Blackbourne LH, Spinella PC. Pediatric trauma BIG score: Predicting mortality in children after military and civilian trauma. *Pediatrics*. 2011;127(4):892.
6. Chen M, Lu X, Hu L, et al. Development and validation of a mortality risk model for pediatric sepsis. *Medicine*. 2017;96(20):e6923.
7. Cheuk DK, Ha SY, Lee SL, Chan GC, Tsoi NS, Lau YL. Prognostic factors in children requiring admission to an intensive care unit after hematopoietic stem cell transplant. *Hematol Oncol*. 2004;22(1):1-9.
8. Choi SJ, Ha EJ, Jhang WK, Park SJ. Platelet indices as predictive markers of prognosis in pediatric septic shock patients. *Iranian Journal of Pediatrics*. 2017;27(3).
9. Chua MN, Molanida R, de Guzman M, Laberiza F. Prothrombin time and partial thromboplastin time as a predictor of bleeding in patients with dengue hemorrhagic fever. *Southeast Asian J Trop Med Public Health*. 1993;24 Suppl 1:141-3.
10. Couto-Alves A, Wright VJ, Perumal K, et al. A new scoring system derived from base excess and platelet count at presentation predicts mortality in paediatric meningococcal sepsis. *Crit Care*. 2013;17(2):R68.
11. El Basset Abo El Ezz, A. A., Abd El Hafez, M. A., El Amrousy DM, El Momen Suliman, G. A. The predictive value of von willebrand factor antigen plasma levels in children with acute lung injury. *Pediatr Pulmonol*. 2017;52(1):91-97.
12. Ersoy B, Nehir H, Altinoz S, Yilmaz O, Dundar PE, Aydogan A. Prognostic value of initial antithrombin levels in neonatal sepsis. *Indian Pediatr*. 2007;44(8):581-4.
13. Faraoni D, Willems A, Savan V, Demanet H, De Ville A, Van der Linden P. Plasma fibrinogen concentration is correlated with postoperative blood loss in children undergoing cardiac surgery. A retrospective review. *Eur J Anaesthesiol*. 2014;31(6):317-26.
14. Faraoni D, Willems A, Romlin BS, Belisle S, Van der Linden P. Development of a specific algorithm to guide haemostatic therapy in children undergoing cardiac surgery: A single-centre retrospective study. *Eur J Anaesthesiol*. 2015;32(5):320-9.
15. Foad HM, Labib JR, Metwally HG, El-Twab K. Plasma D-dimer as a prognostic marker in ICU admitted egyptian children with traumatic brain injury. *Journal of clinical and diagnostic research : JCDR*. 2014;8(9):Pc01-6.
16. Graciano AL, Balko JA, Rahn DS, Ahmad N, Giroir BP. The pediatric multiple organ dysfunction score (P-MODS): Development and validation of an objective scale to measure the severity of multiple organ dysfunction in critically ill children. *Crit Care Med*. 2005;33(7):1484-91.
17. Grandjean-Blanchet C, Emeriaud G, Beaudin M, Gravel J. Retrospective evaluation of the BIG score to predict mortality in pediatric blunt trauma. *Cjem*. 2018;20(4):592-599.
18. Housinger TA, Brinkerhoff C, Warden GD. The relationship between platelet count, sepsis, and survival in pediatric burn patients. *Archives of surgery (Chicago, Ill : 1960)*. 1993;128(1):65-6; discussion 66.
19. Hu GW, Lang HL, Guo H, et al. A risk score based on admission characteristics to predict progressive hemorrhagic injury from traumatic brain injury in children. *Eur J Pediatr*. 2017;176(6):689-696.
20. Huang SC, Yang YJ. Septic shock and hypofibrinogenemia predict a fatal outcome in childhood acute acalculous cholecystitis. *J Pediatr Gastroenterol Nutr*. 2011;53(5):548-52.

21. Isguder R, Ceylan G, Agin H, et al. Increased mean platelet volume in children with sepsis as a predictor of mortality. *Turk J Pediatr*. 2016;58(5):503-511.
22. Jevtic D, Vujic D, Zecevic Z, Veljkovic D, Gazikalovic S, Elezovic I. Coagulation disturbances in paediatric patients with hepatic veno-occlusive disease after stem cells transplantation. *Srp Arh Celok Lek*. 2010;138 Suppl 1:33-8.
23. Jhang WK, Ha EJ, Park SJ. Evaluation of disseminated intravascular coagulation scores in critically ill pediatric patients. *Pediatric critical care medicine : a journal of the Society of Critical Care Medicine and the World Federation of Pediatric Intensive and Critical Care Societies*. 2016;17(5):239.
24. Jhang WK, Ha E, Park SJ. Evaluation of disseminated intravascular coagulation scores in critically ill pediatric patients with septic shock. *J Crit Care*. 2018;47:104-108.
25. Kalkwarf KJ, Jensen SD, Allukian M, 3, et al. Can we identify futility in kids? an evaluation of admission parameters predicting 100% mortality in 1,292 severely injured children. *J Am Coll Surg*. 2018;226(4):662-667.
26. Kamal HM, Sammou H, Mardini AA, Zaitoni A. Fall of platelet count in children with traumatic brain injury: Is it of value? *Chinese journal of traumatology = Zhonghua chuang shang za zhi*. 2011;14(6):336-42.
27. Kilpi T, Anttila M, Kallio MJ, Peltola H. Thrombocytosis and thrombocytopenia in childhood bacterial meningitis. *Pediatr Infect Dis J*. 1992;11(6):456-60.
28. Kornelisse RF, Hazelzet JA, Hop WC, et al. Meningococcal septic shock in children: Clinical and laboratory features, outcome, and development of a prognostic score. *Clinical infectious diseases : an official publication of the Infectious Diseases Society of America*. 1997;25(3):640-6.
29. Krishnan J, Morrison W, Simone S, Ackerman A. Implications of thrombocytopenia and platelet course on pediatric intensive care unit outcomes. *Pediatric critical care medicine : a journal of the Society of Critical Care Medicine and the World Federation of Pediatric Intensive and Critical Care Societies*. 2008;9(5):502-5.
30. Lal J, Thapa BR, Rawal P, Ratho RK, Singh K. Predictors of outcome in acute-on-chronic liver failure in children. *Hepatology international*. 2011;5(2):693-7.
31. Leeper C, Nasr I, McKenna C, Berger RP, Gaines BA. Elevated admission INR strongly predicts mortality in victims of abusive head trauma. *The journal of trauma and acute care surgery*. 2015.
32. Leeper CM, Kutcher M, Nasr I, et al. Acute traumatic coagulopathy in a critically injured pediatric population: Definition, trend over time, and outcomes. *The journal of trauma and acute care surgery*. 2016;81(1):34-41.
33. Leeper CM, Nasr I, McKenna C, Berger RP, Gaines BA. Elevated admission international normalized ratio strongly predicts mortality in victims of abusive head trauma. *The journal of trauma and acute care surgery*. 2016;80(5):711-6.
34. Leeper CM, Neal MD, McKenna C, Sperry JL, Gaines BA. Abnormalities in fibrinolysis at the time of admission are associated with deep vein thrombosis, mortality, and disability in a pediatric trauma population. *Journal of Trauma and Acute Care Surgery*. 2017;82(1):27-33.
35. Leeper CM, Neal MD, Billiar TR, Sperry JL, Gaines BA. Overresuscitation with plasma is associated with sustained fibrinolysis shutdown and death in pediatric traumatic brain injury. *J Trauma Acute Care Surg*. 2018;85(1):12-17.
36. Lin JJ, Hsiao HJ, Chan OW, Wang Y, Hsia SH, Chiu CH. Increased serum thrombomodulin level is associated with disease severity and mortality in pediatric sepsis. *PloS one*. 2017;12(8):e0182324.
37. Liras IN, Cotton BA, Cardenas JC, Harting MT. Prevalence and impact of admission hyperfibrinolysis in severely injured pediatric trauma patients. *Surgery*. 2015;158(3):812-8.
38. Liras IN, Caplan HW, Stensballe J, Wade CE, Cox CS, Cotton BA. Prevalence and impact of admission acute traumatic coagulopathy on treatment intensity, resource use, and mortality: An evaluation of 956 severely injured children and adolescents. *J Am Coll Surg*. 2017;224(4):625-632.

39. Liu E, MacKenzie T, Dobyns EL, et al. Characterization of acute liver failure and development of a continuous risk of death staging system in children. *J Hepatol.* 2006;44(1):134-41.
40. Lu BR, Gralla J, Liu E, Dobyns EL, Narkewicz MR, Sokol RJ. Evaluation of a scoring system for assessing prognosis in pediatric acute liver failure. *Clinical gastroenterology and hepatology : the official clinical practice journal of the American Gastroenterological Association.* 2008;6(10):1140-5.
41. Lu BR, Zhang S, Narkewicz MR, Belle SH, Squires RH, Sokol RJ. Evaluation of the liver injury unit scoring system to predict survival in a multinational study of pediatric acute liver failure. *J Pediatr.* 2013;162(5):1010-6.e1.
42. Malley R, Huskins WC, Kuppermann N. Multivariable predictive models for adverse outcome of invasive meningococcal disease in children. *J Pediatr.* 1996;129(5):702-10.
43. Martins L, Macao P, Pinto C, et al. Invasive meningococcal disease: Application of base excess and platelets score in a portuguese paediatric intensive care unit. *Acta Med Port.* 2015;28(3):342-6.
44. McDiarmid SV, Anand R, Lindblad AS. Development of a pediatric end-stage liver disease score to predict poor outcome in children awaiting liver transplantation. *Transplantation.* 2002;74(2):173-81.
45. McManus ML, Churchwell KB. Coagulopathy as a predictor of outcome in meningococcal sepsis and the systemic inflammatory response syndrome with purpura. *Crit Care Med.* 1993;21(5):706-11.
46. Mitra P, Guha D, Nag SS, Mondal BC, Dasgupta S. Role of plasma fibrinogen in diagnosis and prediction of short term outcome in neonatal sepsis. *Indian journal of hematology & blood transfusion : an official journal of Indian Society of Hematology and Blood Transfusion.* 2017;33(2):195-199.
47. Mitsiakos G, Pana ZD, Chatziioannidis I, et al. Platelet mass predicts intracranial hemorrhage in neonates with gram-negative sepsis. *Journal of pediatric hematology/oncology.* 2015;37(7):519-23.
48. Moxon CA, Chisala NV, Mzikamanda R, et al. Laboratory evidence of disseminated intravascular coagulation is associated with a fatal outcome in children with cerebral malaria despite an absence of clinically evident thrombosis or bleeding. *Journal of Thrombosis and Haemostasis.* 2015;13(9):1653-1664.
49. Niederwanger C, Hell T, Hofer S, et al. Antithrombin deficiency is associated with mortality and impaired organ function in septic pediatric patients: A retrospective study. *PeerJ.* 2018;6:e5538.
50. Niederwanger C, Bachler M, Hell T, et al. Inflammatory and coagulatory parameters linked to survival in critically ill children with sepsis. *Annals of Intensive Care.* 2018;8(1).
51. Oladunjoye OO, Sleeper LA, Nair AG, et al. Partial thromboplastin time is more predictive of bleeding than anti-xa levels in heparinized pediatric patients after cardiac surgery. *J Thorac Cardiovasc Surg.* 2018;156(1):332-340.e1.
52. Oren H, Cingoz I, Duman M, Yilmaz S, Irken G. Disseminated intravascular coagulation in pediatric patients: Clinical and laboratory features and prognostic factors influencing the survival. *Pediatr Hematol Oncol.* 2005;22(8):679-88.
53. Padungmaneesub W, Reungrongrat S, Manowong S, Fanhchaksai K, Panyasit N, Natesirinilkul R. Biomarkers of disseminated intravascular coagulation in pediatric intensive care unit in thailand. *Int J Lab Hematol.* 2019;41(1):32-38.
54. Patregnani JT, Borgman MA, Maegele M, Wade CE, Blackburne LH, Spinella PC. Coagulopathy and shock on admission is associated with mortality for children with traumatic injuries at combat support hospitals. *Pediatric critical care medicine : a journal of the Society of Critical Care Medicine and the World Federation of Pediatric Intensive and Critical Care Societies.* 2012;13(3):273-7.
55. Podolsky-Gondim G, Furlanetti LL, Viana DC, Ballesterio MFM, de Oliveira RS. The role of coagulopathy on clinical outcome following traumatic brain injury in children: Analysis of 66 consecutive cases in a single center institution. *Childs Nerv Syst.* 2018;34(12):2455-2461.
56. Pone SM, Hökerberg YHM, de Oliveira, R. D. V. C., et al. Clinical and laboratory signs associated to serious dengue disease in hospitalized children. *J Pediatr.* 2016;92(5):464-471.

57. Purbiya P, Golwala ZM, Manchanda A, Sreenivas V, Puliye JM. Platelet distribution width to platelet count ratio as an index of severity of illness. *Indian J Pediatr*. 2018;85(1):10-14.
58. Qi YZ, Muzhaper D. [Levels and prognostic significance of serum procalcitonin and D-dimer in children with systemic inflammatory response syndrome]. *Zhongguo dang dai er ke za zhi = Chinese journal of contemporary pediatrics*. 2014;16(4):384-8.
59. Rajkumar V, Kumar B, Dutta V, Mishra AK, Puri GD. Utility of sonoclot in prediction of postoperative bleeding in pediatric patients undergoing cardiac surgery for congenital cyanotic heart disease: A prospective observational study. *J Cardiothorac Vasc Anesth*. 2017;31(3):901-908.
60. Rajpurkar M, Alonzo TA, Wang YC, et al. Risk markers for significant bleeding and thrombosis in pediatric acute promyelocytic leukemia; report from the children's oncology group study AAML0631. *J Pediatr Hematol Oncol*. 2019;41(1):51-55.
61. Ranucci M, Bianchi P, Cotza M, et al. Fibrinogen levels and postoperative chest drain blood loss in low-weight (*Perfusion*. 2019;34(8):629-636.
62. Reed RC, Rutledge JC. Laboratory and clinical predictors of thrombosis and hemorrhage in 29 pediatric extracorporeal membrane oxygenation nonsurvivors. *Pediatric and developmental pathology : the official journal of the Society for Pediatric Pathology and the Paediatric Pathology Society*. 2010;13(5):385-92.
63. Rinka H, Yoshida T, Kubota T, et al. Hemorrhagic shock and encephalopathy syndrome--the markers for an early HSES diagnosis. *BMC pediatrics*. 2008;8:43.
64. Schmidt AE, Gore E, Henrichs KF, et al. Oxidation reduction potential (ORP) is predictive of complications following pediatric cardiac surgery. *Pediatr Cardiol*. 2018;39(2):299-306.
65. Schneider P, Van Dreden P, Rousseau A, et al. Decreased activity of soluble thrombomodulin and plasma procoagulant phospholipids in childhood bone marrow transplantation with severe complications. *Thromb Res*. 2011;128(3):261-7.
66. Schochl H, Solomon C, Taintinger S, et al. Thromboelastometric (ROTEM) findings in patients suffering from isolated severe traumatic brain injury. *J Neurotrauma*. 2011;28(10):2033-41.
67. Selim TE, Ghoneim HR, Khashaba MT, Rakha SA. Plasma soluble fibrin monomer complex is a useful predictor of disseminated intravascular coagulation in neonatal sepsis. *Haematologica*. 2005;90(3):419-421.
68. Selladurai BM, Vickneswaran M, Duraisamy S, Atan M. Coagulopathy in acute head injury--a study of its role as a prognostic indicator. *Br J Neurosurg*. 1997;11(5):398-404.
69. Silva PS, Iglesias SB, Nakakura CH, de Aguiar VE, de Carvalho WB. The product of platelet and neutrophil counts (PN product) at presentation as a predictor of outcome in children with meningococcal disease. *Ann Trop Paediatr*. 2007;27(1):25-30.
70. Sreenivasan P, S G, K S. Development of a prognostic prediction model to determine severe dengue in children. *Indian J Pediatr*. 2018;85(6):433-439.
71. Srivastava A, Yachha SK, Poddar U. Predictors of outcome in children with acute viral hepatitis and coagulopathy. *J Viral Hepat*. 2012;19(2):194.
72. Tekin YK. Are neutrophil-to-lymphocyte and platelet-to-lymphocyte ratios associated with mortality in pediatric trauma patients? A retrospective study. *Rambam Maimonides Med J*. 2019;10(4).
73. Thebaud B, Husson B, Navelet Y, et al. Haemorrhagic shock and encephalopathy syndrome: Neurological course and predictors of outcome. *Intensive Care Med*. 1999;25(3):293-9.
74. Tirosh-Wagner T, Strauss T, Rubinshtein M, et al. Point of care testing in children undergoing cardiopulmonary bypass. *Pediatric Blood and Cancer*. 2011;56(5):794-798.
75. Trifa M, Ben Yahia MM, Saada S, et al. [Thrombopenia and the nature of the microorganism in infected critically ill children]. *Arch Pediatr*. 2014;21(10):1073-8.
76. Tude Melo JR, Rocco FD, Blanot S, et al. Mortality in children with severe head trauma: Predictive factors and proposal for a new predictive scale. *Neurosurgery*. 2010;67(6):1542-1547.

77. Tzanetos DRT, Yu C, Hernanz-Schulman M, Barr FE, Brown NJ. Prospective study of the incidence and predictors of thrombus in children undergoing palliative surgery for single ventricle physiology. *Intensive Care Med.* 2012;38(1):105-112.
78. Vogel AM, Radwan ZA, Cox CS, J., Cotton BA. Admission rapid thrombelastography delivers real-time "actionable" data in pediatric trauma. *J Pediatr Surg.* 2013;48(6):1371-6.
79. Wang CY, Song CM, Zheng QA. [Significance of soluble P-selectin in diagnosis of pre-disseminated intravascular coagulation state in children with severe pneumonia]. *Zhonghua er ke za zhi = Chinese journal of pediatrics.* 2012;50(12):948-52.
80. Whittaker B, Christiaans SC, Altice JL, et al. Early coagulopathy is an independent predictor of mortality in children after severe trauma. *Shock (Augusta, Ga.).* 2013;39(5):421-6.
81. Yang L, Ye L, Fan Y, et al. Outcomes following venoarterial extracorporeal membrane oxygenation in children with refractory cardiogenic disease. *Eur J Pediatr.* 2019;178(6):783-793.
82. Ye S, Zhang Y, Zhang C, Xu D. Are platelet volume indices related to mortality in hospitalized children on mechanical ventilation? *J Int Med Res.* 2018;46(3):1197-1208.
83. Zafra Anta M, Diaz Fernandez C, Hierro Llanillo L, et al. Acute hepatic failure in childhood. an analysis of 51 cases. *Acta Pediatrica Espanola.* 1994;52(6):346-352.
84. Zavadil DP, Stammers AH, Willett LD, Deptula JJ, Christensen KA, Sydzyk RT. Hematological abnormalities in neonatal patients treated with extracorporeal membrane oxygenation (ECMO). *J Extra Corpor.* 1998;30(2):83-90.
85. Zinter MS, Spicer A, Orwoll BO, et al. Plasma angiopoietin-2 outperforms other markers of endothelial injury in prognosticating pediatric ARDS mortality. *American journal of physiology Lung cellular and molecular physiology.* 2016;310(3):224.
86. Zubair MM, Bailly DK, Lantz G, et al. Preoperative platelet dysfunction predicts blood product transfusion in children undergoing cardiac surgery. *Interactive cardiovascular and thoracic surgery.* 2015;20(1):24-30.

## Research Priorities

We propose 4 scientific priorities.

- 1) To validate other biomarkers that can define coagulation dysfunction (e.g., von Willebrand factor, antithrombin, thrombomodulin, mean platelet volume, platelet distribution width, oxidation reduction potential, angiopoietin, platelet dysfunction and viscoelastic measures of hemostasis, such as thromboelastography or thromboelastometry). Each of these biomarkers should be tested in multicenter studies to enhance the external validity of the findings. Thresholds that maximize the sensitivity and specificity of each biomarker should be determined by analysis of study data rather than being set *a priori* and then analyzed against a determined outcome. Testing should also be standardized. Widespread use of thromboelastography and thromboelastometry has been hindered by lack of standardization of these assays. Lastly, the performance of these biomarkers singly and in combination with the proposed criteria for coagulation dysfunction should be evaluated.
- 2) To define coagulation dysfunction in children on mechanical circuits, such as extracorporeal membrane oxygenation, ventricular assist device and continuous renal replacement therapy. Given the severity of illness among children receiving these therapies, coagulation dysfunction is likely common and encompasses both excessive bleeding and pathologic thrombosis. However, the use of anticoagulation confounds the diagnosis of coagulation dysfunction under these conditions. Exclusion of aPTT values, a commonly used measure of anticoagulation in children on mechanical circuits, in our proposed criteria potentially limits confounding. In addition to anticoagulation while on mechanical circuits, the interaction between the blood and the mechanical circuit *per se* may have effects on the levels of the biomarkers included in our proposed criteria. Extracorporeal membrane oxygenation, for example, is known to affect platelet count and fibrinogen levels. Future studies should identify biomarkers of coagulation dysfunction that are specific to children on mechanical circuits, or perhaps, identify different thresholds using the same biomarkers in our proposed criteria. Included foci of investigation should be the development of abnormal platelet function (both hyper- and hypofunction) under these conditions and the clinical impact produced. It is also important to characterize the temporal course of the different

biomarkers after cessation of the mechanical circuit and/or anticoagulation. This will determine the time period when our proposed criteria are already valid in identifying coagulation dysfunction among children who were recently on mechanical circuits.

3) The third scientific priority is to test coagulation parameters, such as platelet count, INR, fibrinogen, D-dimer and others, as continuous variables with clinical measures of altered hemostasis, including excessive bleeding or pathologic thrombosis, as the outcome measure. Limited data informed our proposed criteria for coagulation dysfunction in critically ill children. A major limitation of the selected studies is that none identified threshold values for important parameters, i.e., platelet count, INR, fibrinogen, D-dimer and others, that resulted in abnormal hemostasis, such as excessive bleeding. Rather, they chose values based on prior studies and tested them for effect on a chosen outcome, most commonly mortality. While these values have been shown to be associated with an increased risk of mortality in the studied patient populations, there is minimal definitive data linking them with coagulation dysfunction, e.g., hemorrhage or pathologic thrombosis. There is also minimal data to indicate that the values chosen are indeed the appropriate and informative thresholds. In addition, the specificity of our proposed criteria is anticipated to be significantly better when multiple criteria are combined. However, studies investigating these combinations are not available. Consequently, these parameters should be tested singly and in combination.

4) The fourth research priority is to identify biomarkers of altered coagulation resulting in abnormal thrombus formation. Candidate biomarkers may be similar to those assessed as markers of hemorrhage risk and should be investigated in a parallel fashion in clinical studies in which the outcome measures include excessive bleeding or pathologic thrombosis. Given the role that endothelial cells play in the regulation of hemostasis, these studies will also need to consider including biomarkers of endothelial cell function or injury. Again, it is not sufficient to only identify an association with an outcome, but the preferred studies should identify a clinically meaningful threshold value for the biomarker.
